# Supplementary material
Source: PubMed Central journal article supplement (PMC7544943)
Supplement: TBSD_A_1819879_SM0340.pdf [file TBSD_A_1819879_SM0340.pdf]

## **Supplementary Information**

# **In Silico Investigation of Spice Molecules as Potent Inhibitor of SARS-CoV-2**

**Janmejaya Rout, Bikash Chandra Swain, and Umakanta Tripathy\***

Department of Physics, Indian Institute of Technology (Indian School of Mines), Dhanbad,  
826004, Jharkhand, India.

\*Corresponding author E-mail: [utripathy@iitism.ac.in](mailto:utripathy@iitism.ac.in)

**Table S1:** List of selected spice molecules with their PubChem ID and source supplement.

| SI No | Molecules                       | Source of origin                                                                                                                 |
|-------|---------------------------------|----------------------------------------------------------------------------------------------------------------------------------|
| 1.    | 2-decenoic acid (5282724)       | Coriander ( <i>Coriandrum sativum</i> L.) essential oil (Laribi, Kouki, M'Hamdi & Bettaieb 2015; Mandal & Mandal 2015)           |
| 2.    | alpha-terpinyl acetate (111037) | Cardamom ( <i>E. cardamomum</i> ) seed (Chowdhury & Kumar 2020)                                                                  |
| 3.    | Capsaicin (1548943)             | Hot peppers or red chillies (Hayman & Kam 2008)                                                                                  |
| 4.    | Carvone (7439)                  | Caraway (Baysal & Starmans 1999)                                                                                                 |
| 5.    | Cinnamaldehyde (637511)         | Cinnamon (Masghati & Ghoreishi 2018)                                                                                             |
| 6.    | Cuminaldehyde (326)             | Cumin essential oil (Chen et al. 2011)                                                                                           |
| 7.    | Dipropyl disulfide (12377)      | Onion essential oil (Mnayer et al. 2014)                                                                                         |
| 8.    | Eucalyptol (2758)               | Aromatic plants (De Vincenzi, Silano, De Vincenzi, Maialetti & Scazzocchio 2002; Juergens et al. 2003)                           |
| 9.    | Linalool (6549)                 | Coriander seed essential oil (Mandal & Mandal 2015)                                                                              |
| 10.   | Vanillin (1183)                 | Vanilla bean pods (Jadhav, B.N, Gogate & Rathod 2009)                                                                            |
| 11.   | Thymol (6898)                   | Essential oil from ajwain seed (Anwar, Ahmed, Habibatni & Abusamra 2016) and of thyme (Nagoor Meeran, Jagadeesh & Selvaraj 2016) |
| 12.   | Sabinene hydrate (62367)        | Origanum majorana (Novak et al. 2000)                                                                                            |
| 13.   | Piperine (638024)               | Pepper (Raman & Gaikar 2002)                                                                                                     |
| 14.   | Menthol (1254)                  | Mint (Nair 2001)                                                                                                                 |
| 15.   | Eugenol (3314)                  | Clove oil, nutmeg oil, cinnamon (Khalil et al. 2017)                                                                             |
| 16.   | Estragole (8815)                | Basil oil (Pushpangadan & George 2012)                                                                                           |
| 17.   | Gingerol (442793)               | Ginger (Mao et al. 2019)                                                                                                         |

|     |                           |                                                                                                                                                                       |
|-----|---------------------------|-----------------------------------------------------------------------------------------------------------------------------------------------------------------------|
| 18. | Shogaol (5281794)         | Ginger (Mao et al. 2019)                                                                                                                                              |
| 19. | Paradol (94378)           | Ginger (Mao et al. 2019)                                                                                                                                              |
| 20. | Zingerone (31211)         | Ginger (Mao et al. 2019)                                                                                                                                              |
| 21. | Borneol (64685)           | Branches and leaves of <i>Cinnamomum camphora</i> (L.) Presl (Sheng, Du, Qiang & Du 2018)                                                                             |
| 22. | Bornyl acetate (6448)     | Pine oil (Fu, McCue & Boesenberg 2007; Bonikowski, Celinski, Wojnicka-Poltorak & Malinski 2015)                                                                       |
| 23. | Citral (638011)           | citrus fruit's peel oil (Tamer, Suna & Özcan-Sinir 2019)                                                                                                              |
| 24. | Citronellal (7794)        | Citronella essential oil (Silva, Moura, Mendes & Pessoa 2011; Pujiastuti, Cahyono & Sumarni 2017)                                                                     |
| 25. | 2-Undecanone (8163)       | Leaf essential oils of <i>Zanthoxylum armatum</i> DC (Rutaceae) (Bisht & Chanotiya 2011), Essential oil obtained from <i>H. cordata</i> (Chen, Wang, Shi & Fang 2014) |
| 26. | Geranyl acetate (1549026) | palmarosa oil (Dubey & Luthra 2001)                                                                                                                                   |
| 27. | Nerolidol (5284507)       | <i>Baccharis dracunculifolia</i> DC (Asteraceae) (Klopell et al. 2007)                                                                                                |
| 28. | Terpinen-4-ol (11230)     | Tea-tree oil (Shapira, Pleban, Kazanov, Tirosh & Arber 2016)                                                                                                          |
| 29. | Terpineol (17100)         | Cardamom oil (Bernhard, Wijesekera & Chichester 1971)                                                                                                                 |
| 30. | Decanal (8175)            | Essential oil of <i>Iris pallida</i> rhizomes and leaves (Mykhailenko 2018)                                                                                           |

**Table S2:** Contribution of different energy terms to binding free energy from MMPBSA method.

| Compound        | Van der Waal energy (kJ/mol) | Electrostatic energy (kJ/mol) | Polar solvation energy (kJ/mol) | SASA energy (kJ/mol) | Binding energy (kJ/mol) |
|-----------------|------------------------------|-------------------------------|---------------------------------|----------------------|-------------------------|
| Spro - Piperine | -7.232 ± 0.312               | -0.792 ± 0.102                | 3.574 ± 0.972                   | -1.084 ± 0.048       | -5.533 ± 0.893          |
| Mpro - Piperine | -98.783 ± 0.483              | -19.417 ± 0.187               | 90.956 ± 0.582                  | -10.735 ± 0.047      | -37.971 ± 0.271         |

### RBD Spro residue sequence before ACE2 deleted

```
6n0j.pdb (#0) chain E 333 TNLCPFGEVFNATRFASVYAWNRKRI SNCVADYSVLYNSASFSTFKCYGV  
6n0j.pdb (#0) chain E 383 SPTKLNDLCFTNVYADSFVIRGDEV RQI APGQTGKI ADYNYKLPDDFTGC  
6n0j.pdb (#0) chain E 433 V IAWNSNNLDSKVG GNYNYLYRLFRKSNLKPFFERDI STEIYQAGSTPCNG  
6n0j.pdb (#0) chain E 483 VEGFN CYFP LQSYGFQPTNGVGYQP YRVVLSFELLHAPATVCG
```

### RBD Spro residue sequence after ACE2 deleted

```
6n0j.pdb (#0) chain E 1 TNLCPFGEVFNATRFASVYAWNRKRI SNCVADYSVLYNSASFSTFKCYGV  
6n0j.pdb (#0) chain E 51 SPTKLNDLCFTNVYADSFVIRGDEV RQI APGQTGKI ADYNYKLPDDFTGC  
6n0j.pdb (#0) chain E 101 V IAWNSNNLDSKVG GNYNYLYRLFRKSNLKPFFERDI STEIYQAGSTPCNG  
6n0j.pdb (#0) chain E 151 VEGFN CYFP LQSYGFQPTNGVGYQP YRVVLSFELLHAPATVCG
```

**Figure S1:** Residue sequence numbers of SARS-CoV-2 RBD Spro before and after ACE2 deletion.

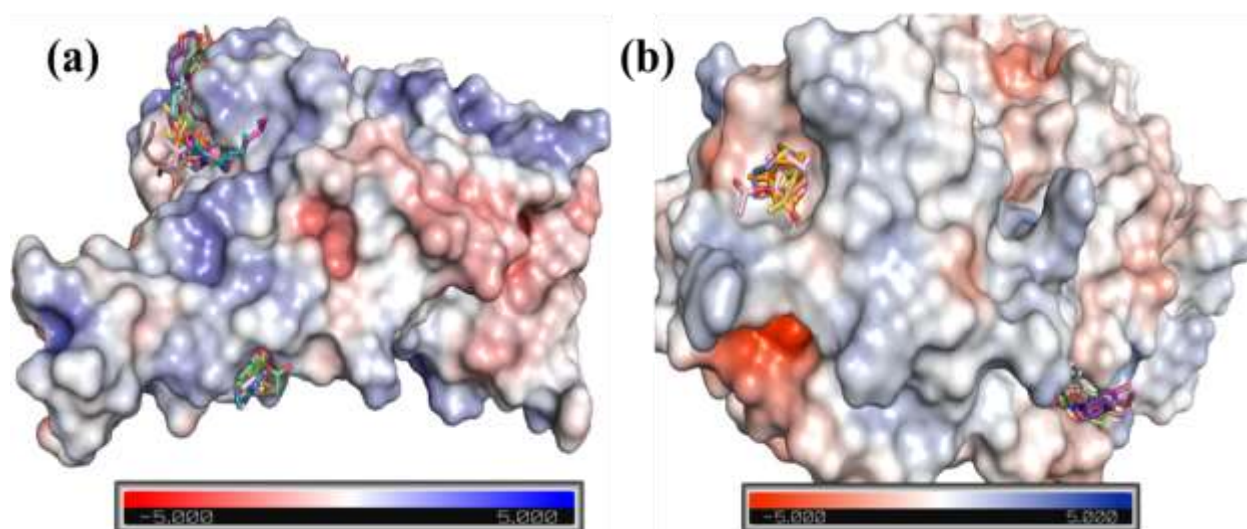

**Figure S2:** Molecular electrostatic surface potential of (a) SARS-CoV-2 Spro, (b) SARS-CoV-2 Mpro in presence of all docked ligands. Red and Blue coloured regions represent the most electronegative and most electropositive regions, respectively.

## 1. 2-Decenoic acid

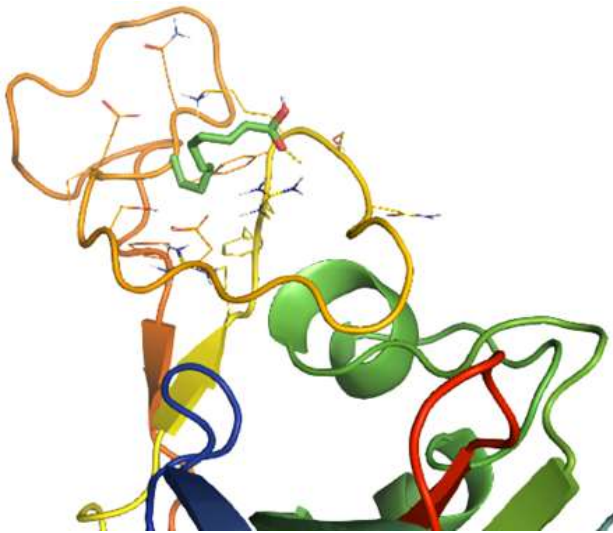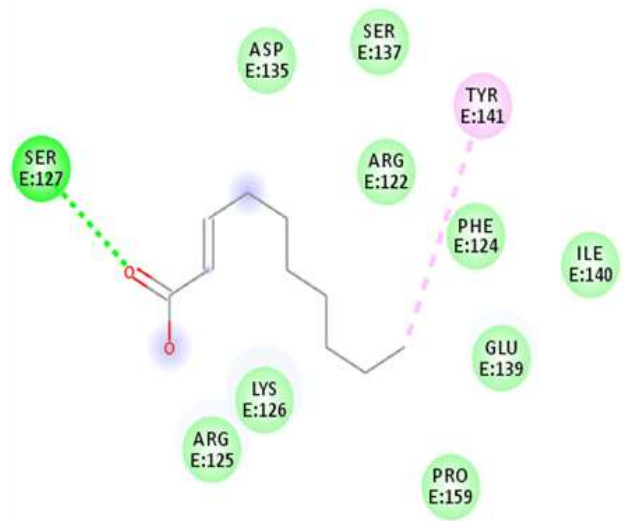

## 2. Alpha-terpinyl acetate

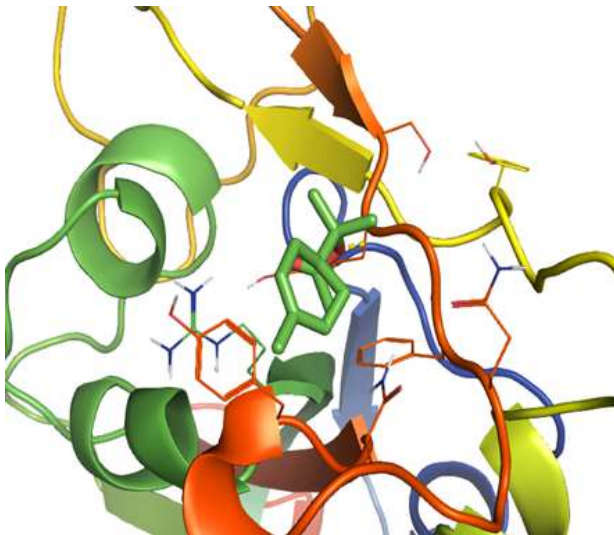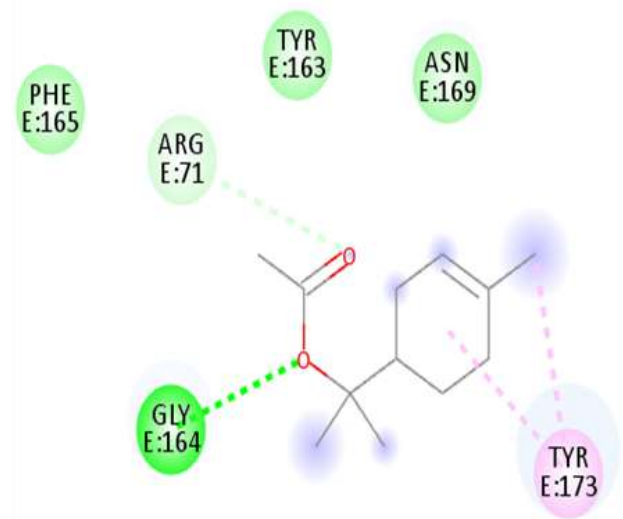

### 3. Carvone

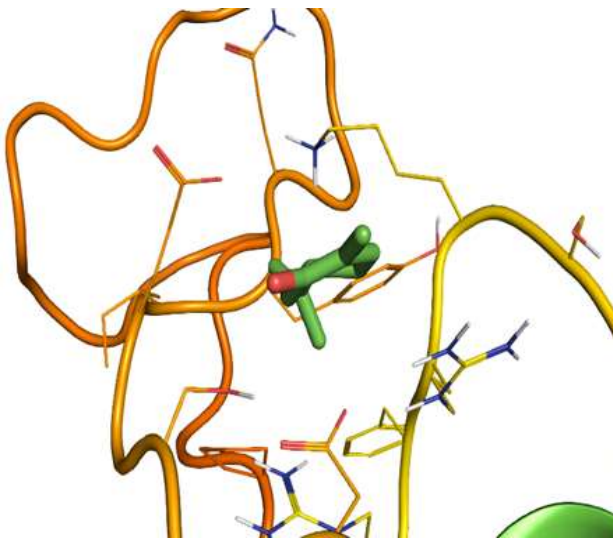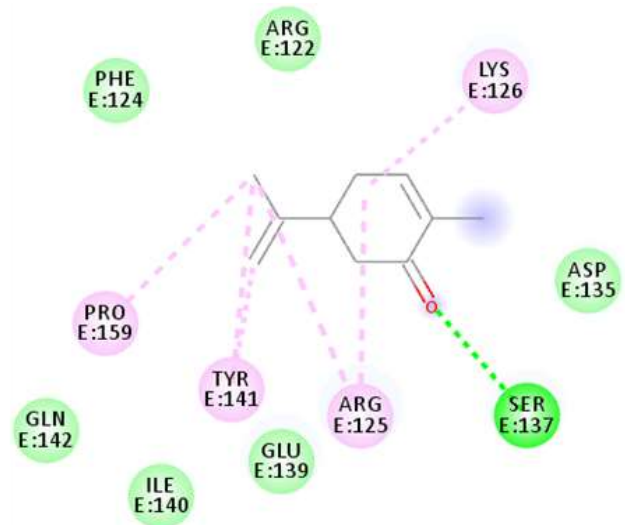

### 4. Cinnamaldehyde

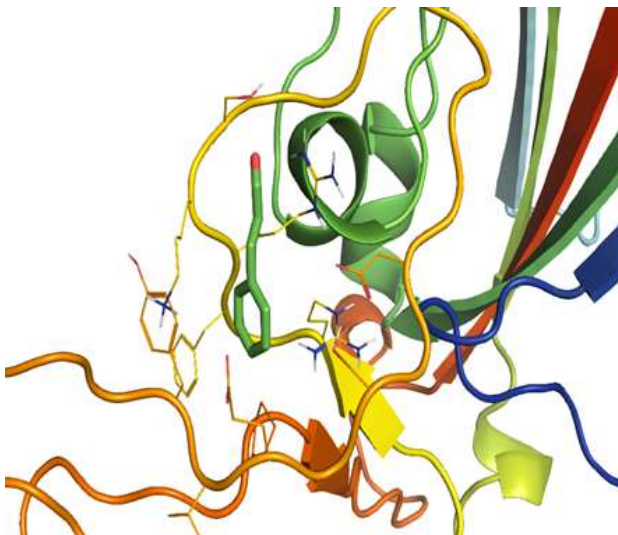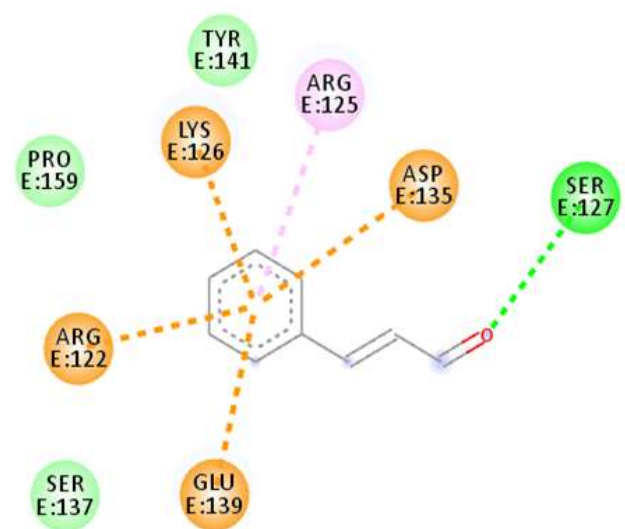

## 5. Cuminaldehyde

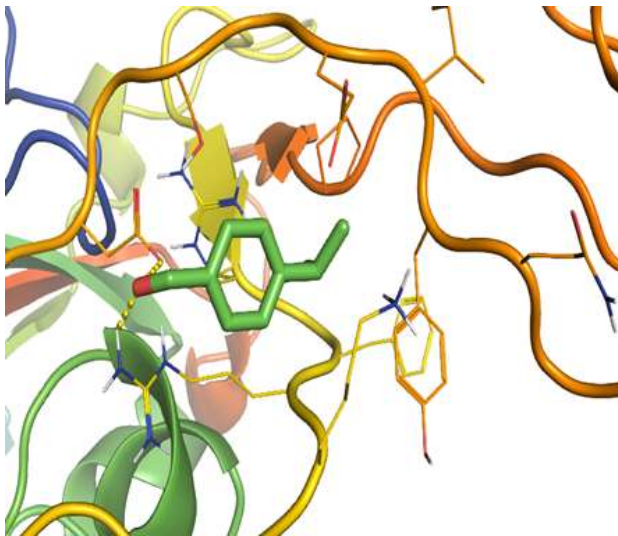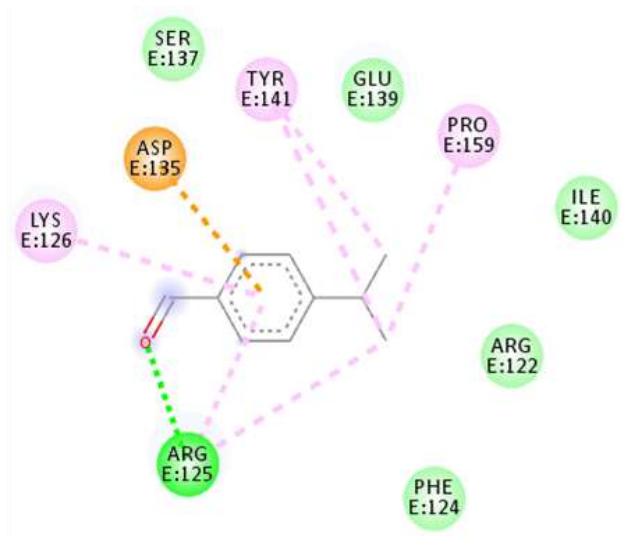

## 6. Dipropyl disulfide

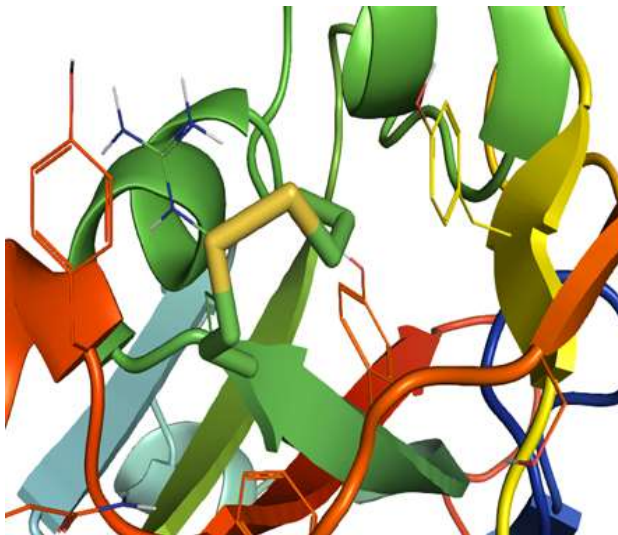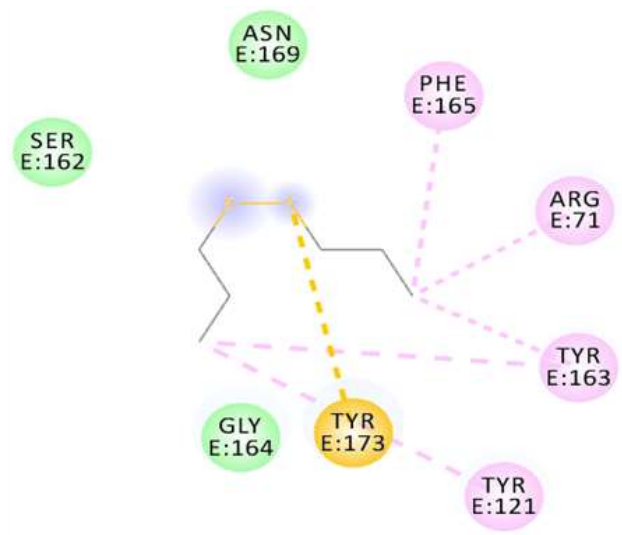

## 7. Eucalyptol

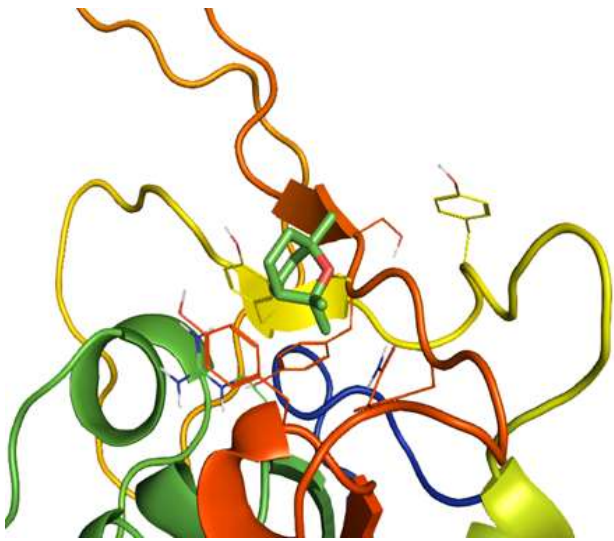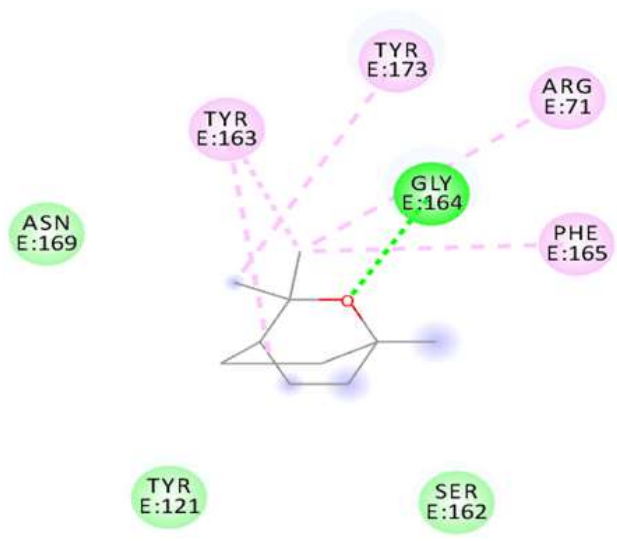

## 8. Linalool

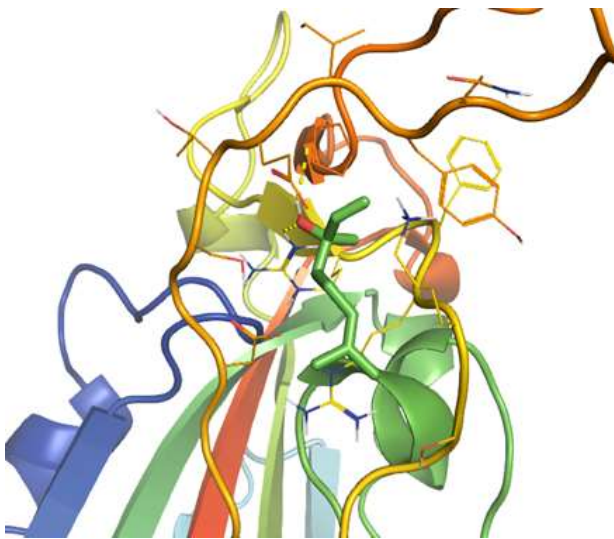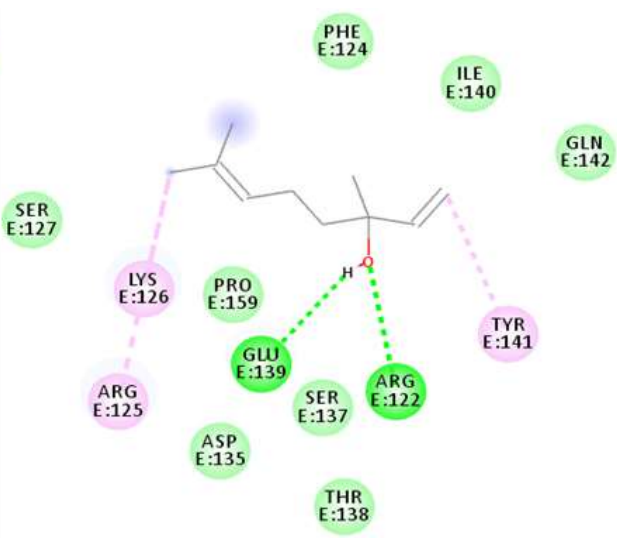



## 9. Vanillin

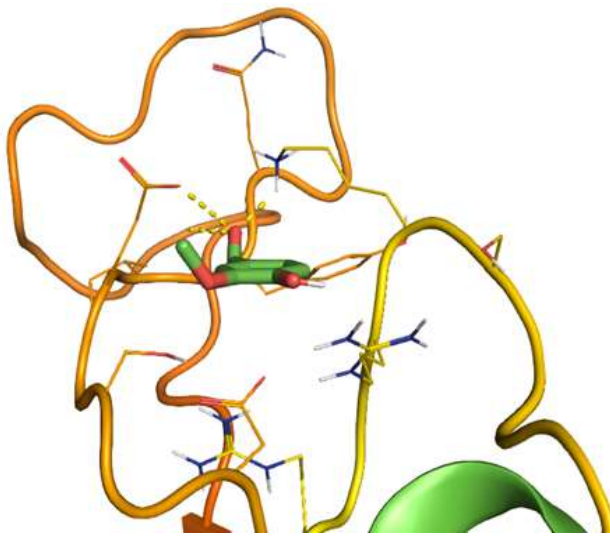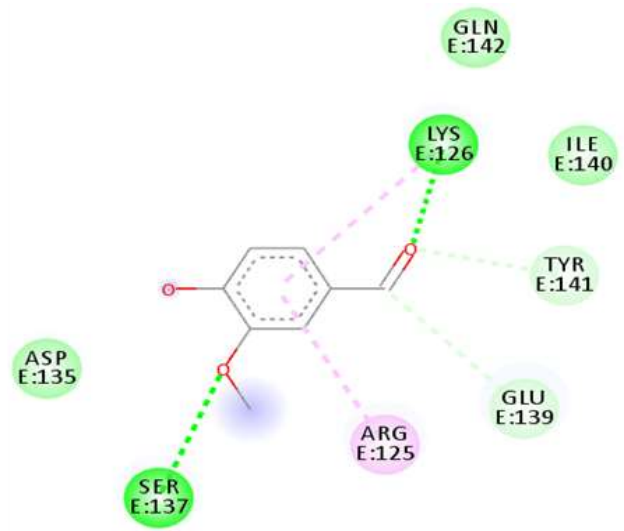

## 10. Thymol

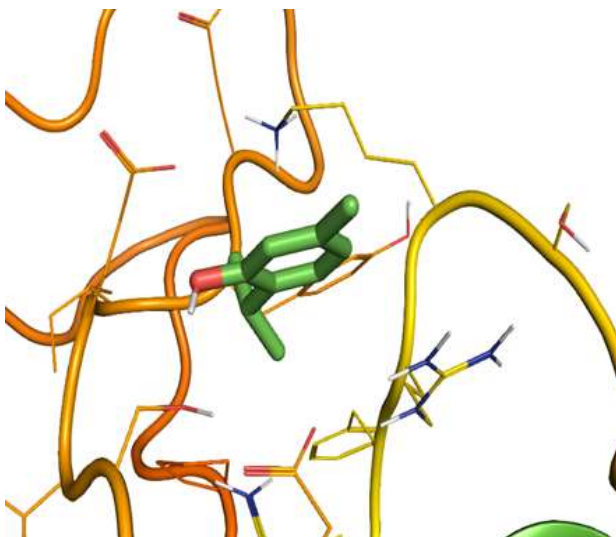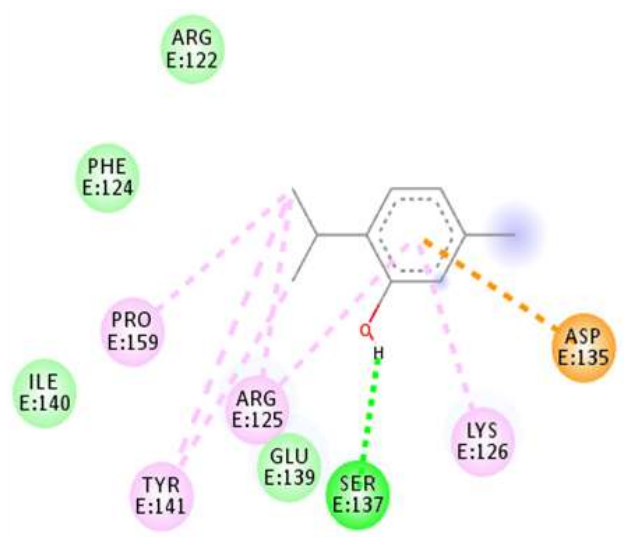

## 11. Sabinene hydrate

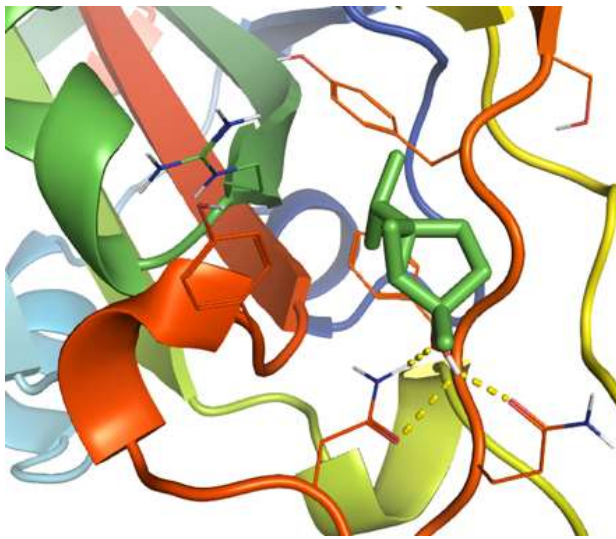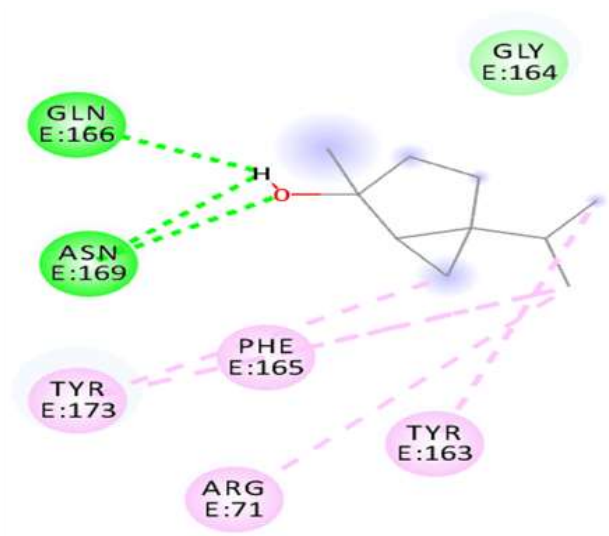

## 12. Menthol

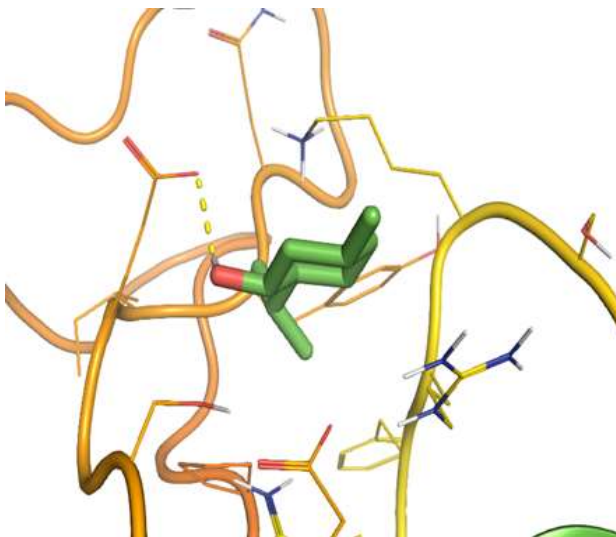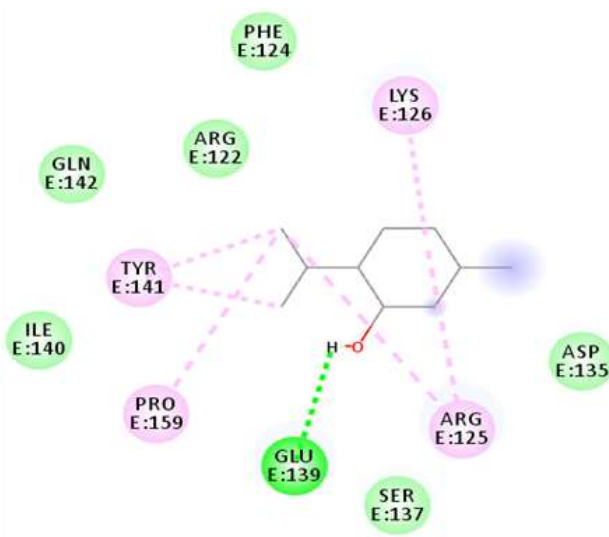

### 13. Eugenol

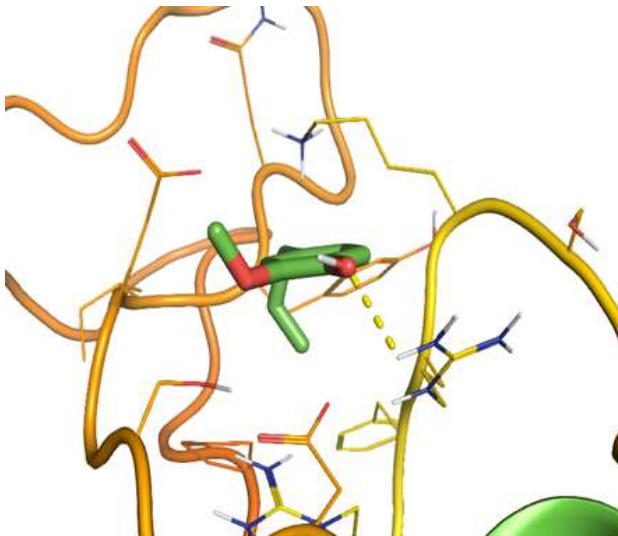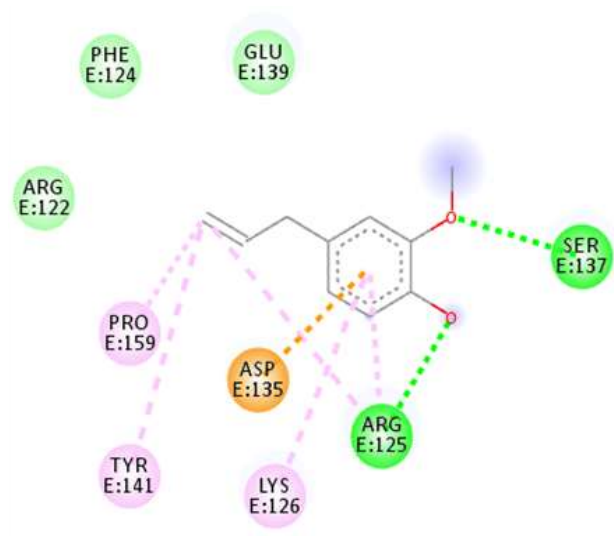

### 14. Estragole

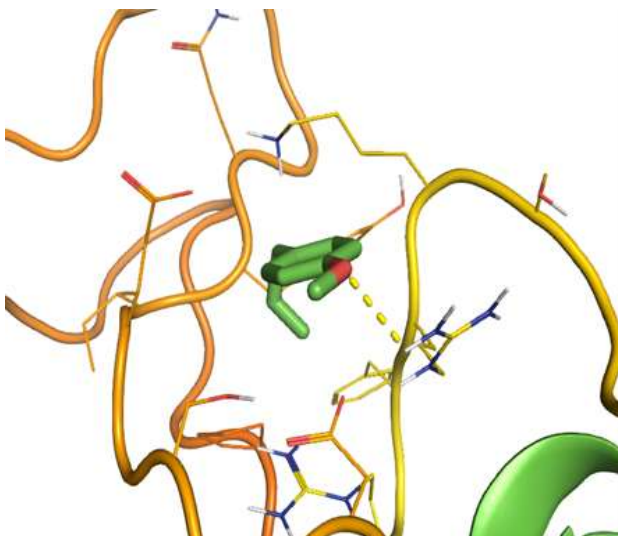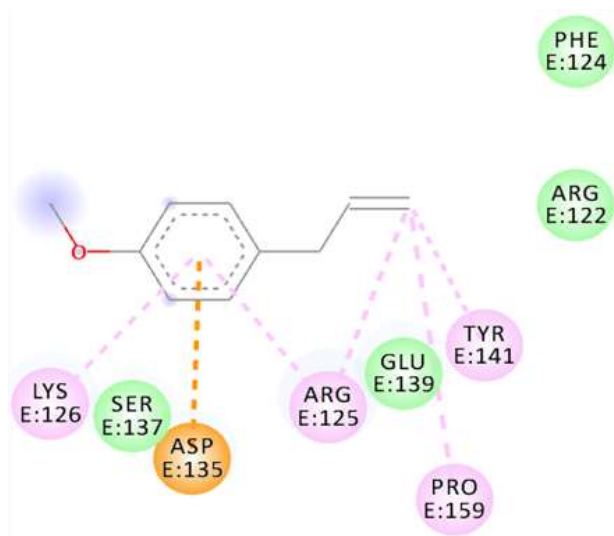

## 15. Shogaol

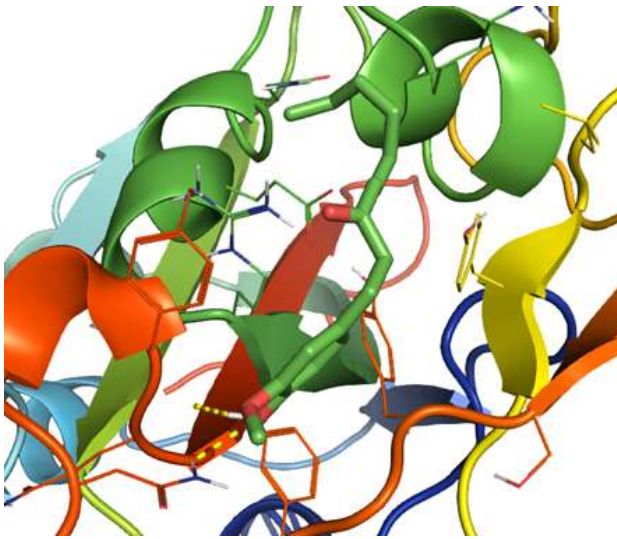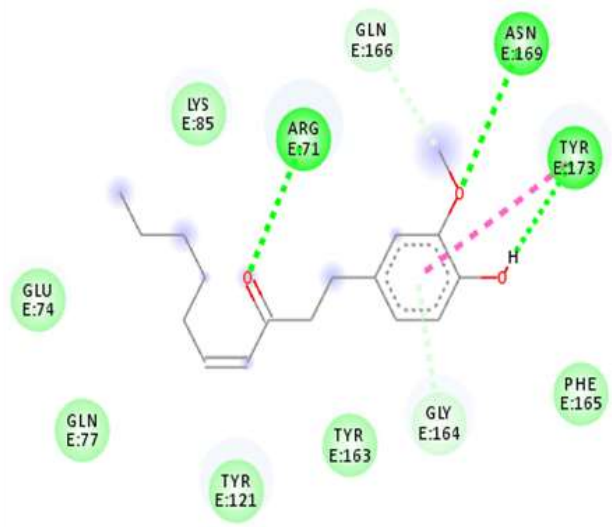

## 16. Paradol

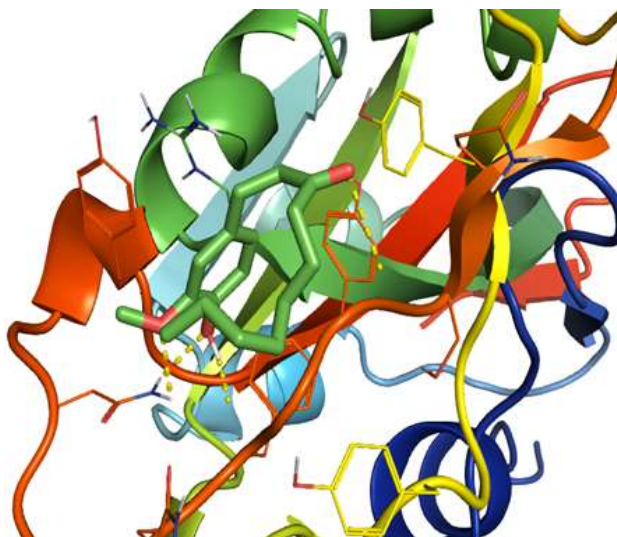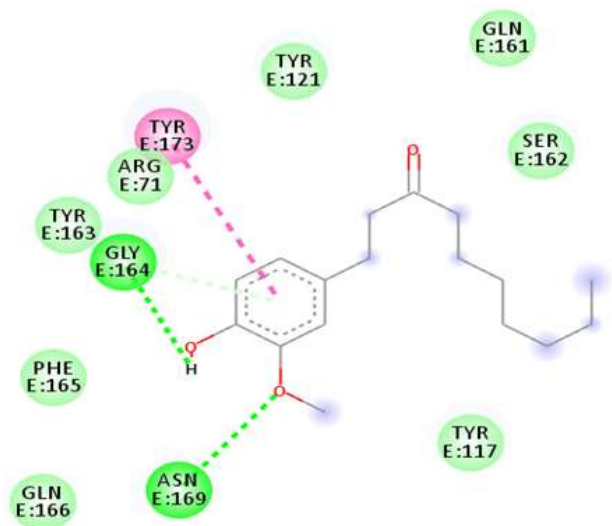

## 17. Zingerone

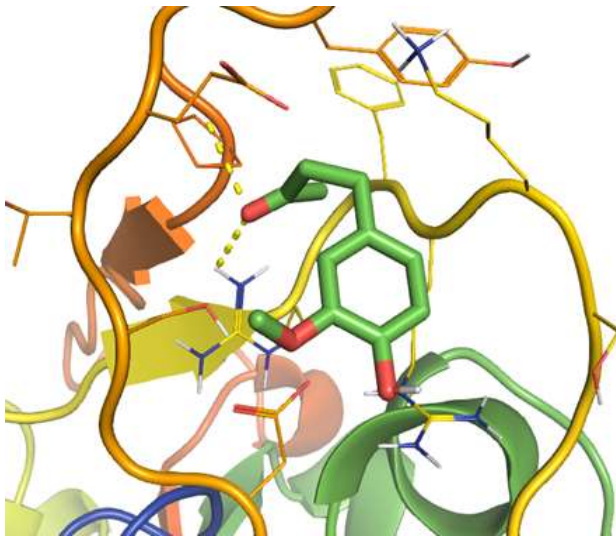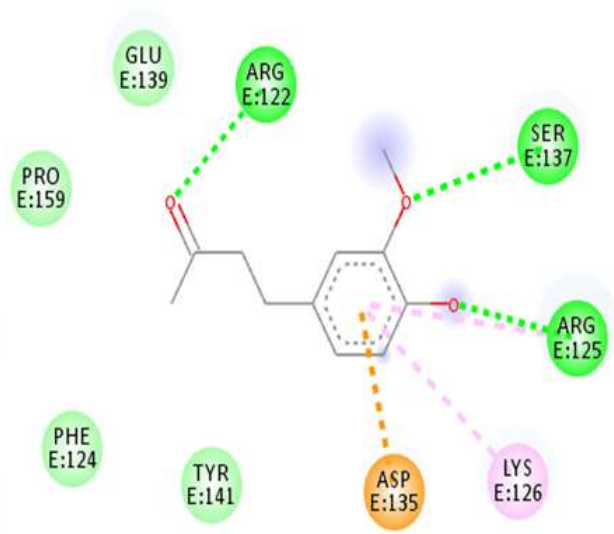

## 18. Borneol

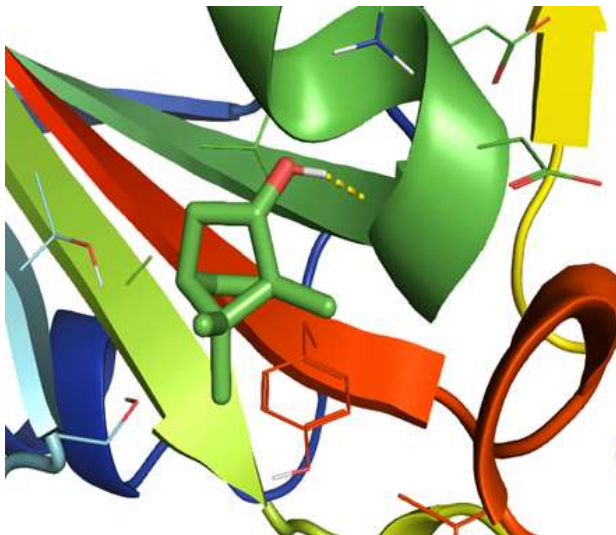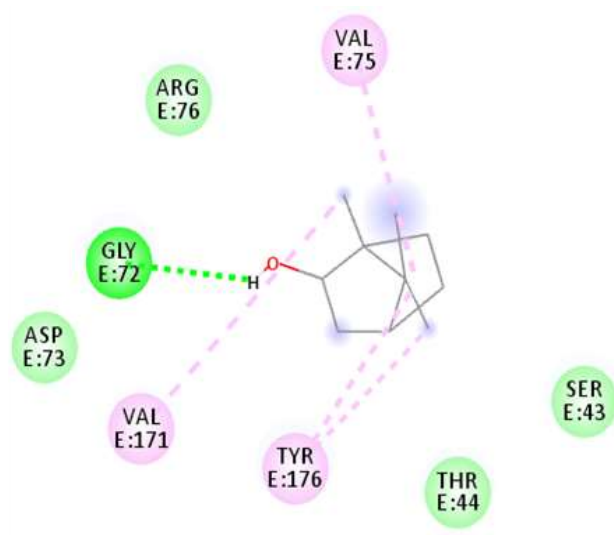

## 19. Bornyl acetate

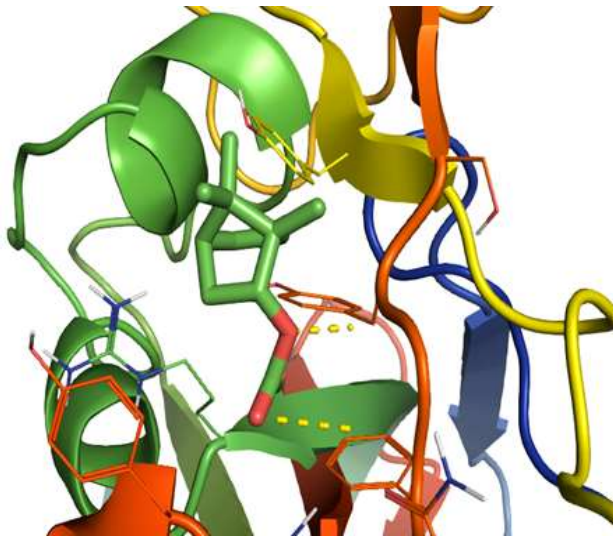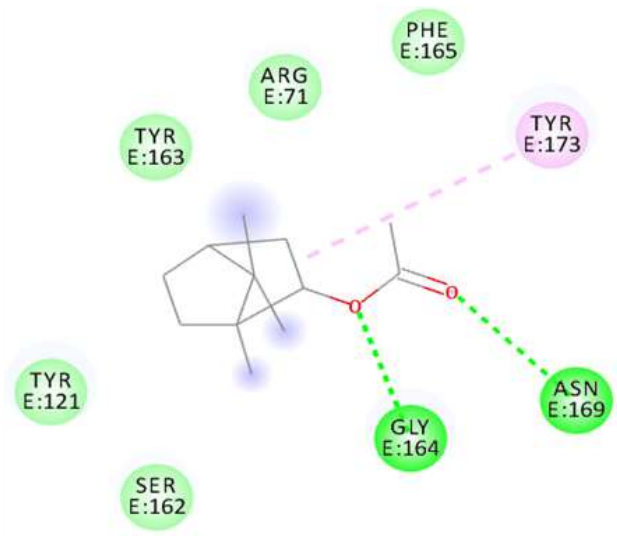

## 20. Citral

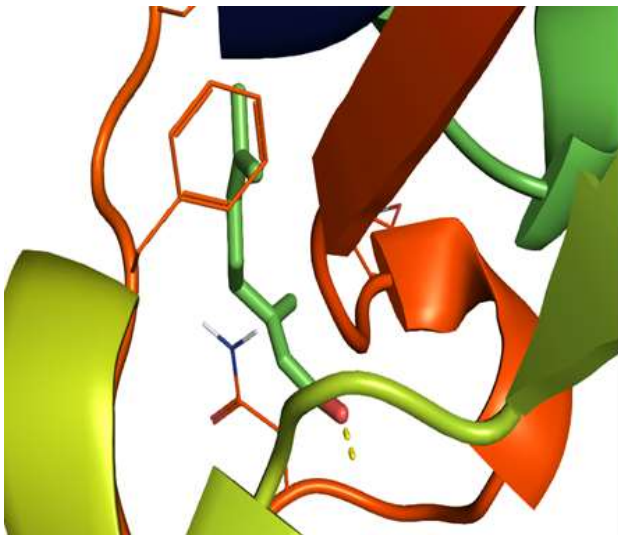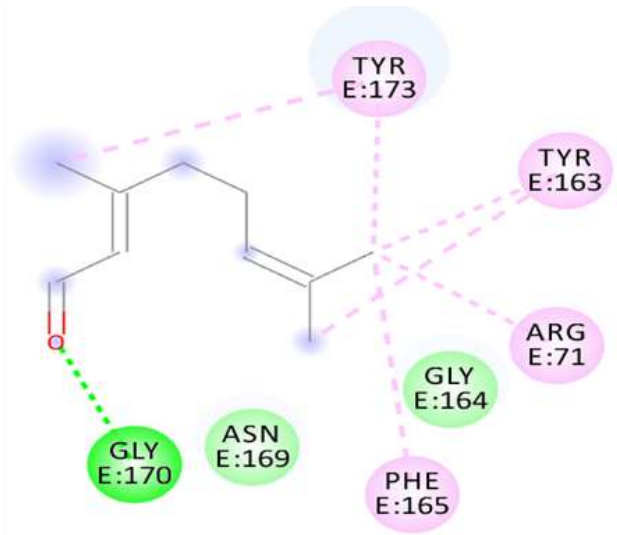

## 21. Citronellal

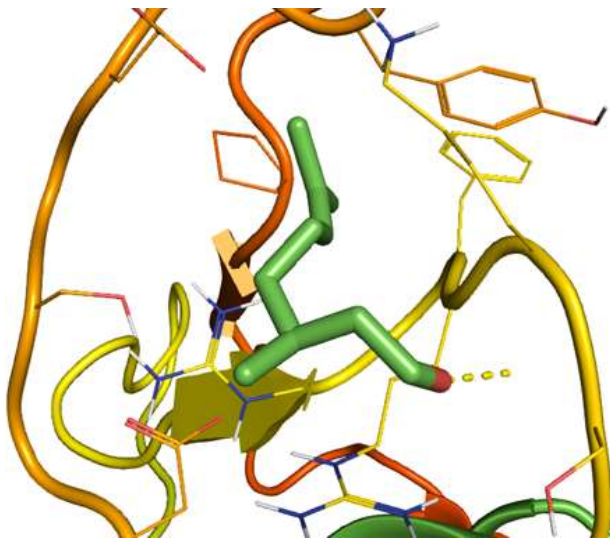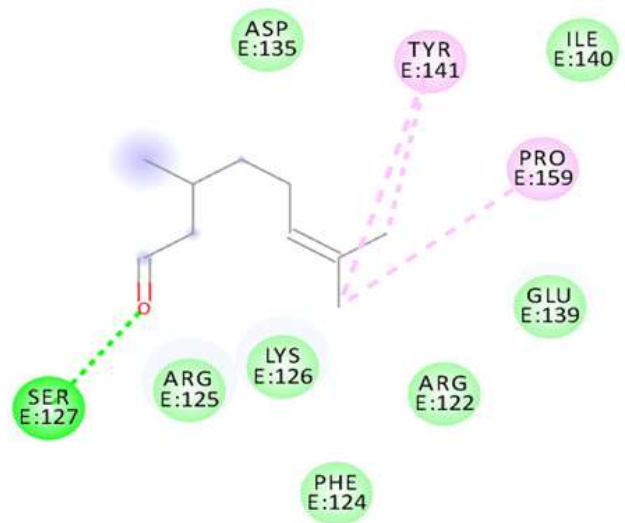

## 22. 2-Undecanone

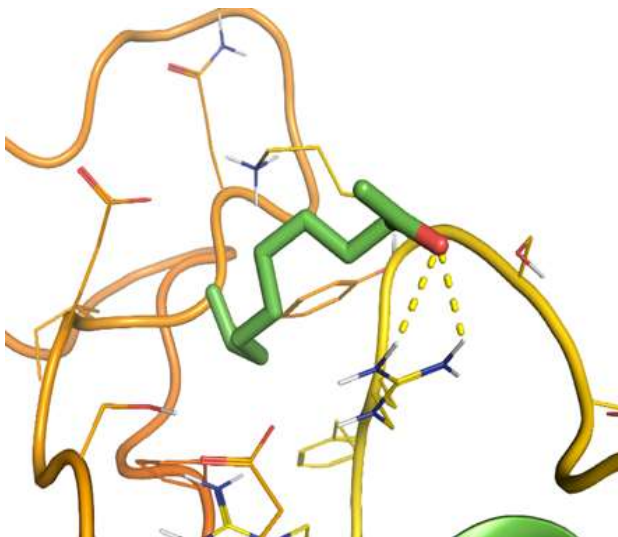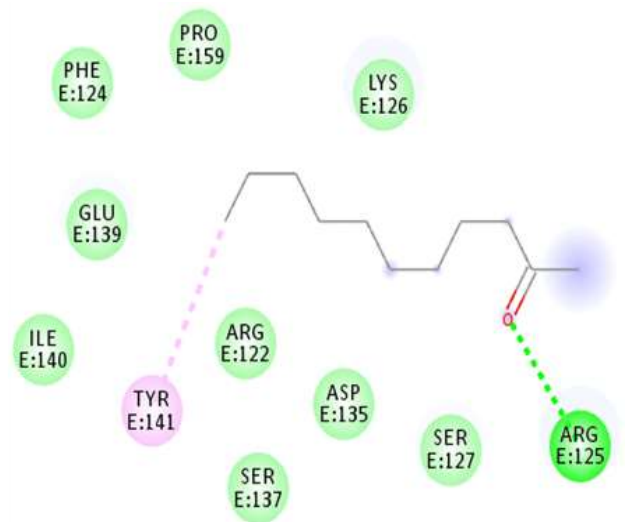

### 23. Geranyl acetate

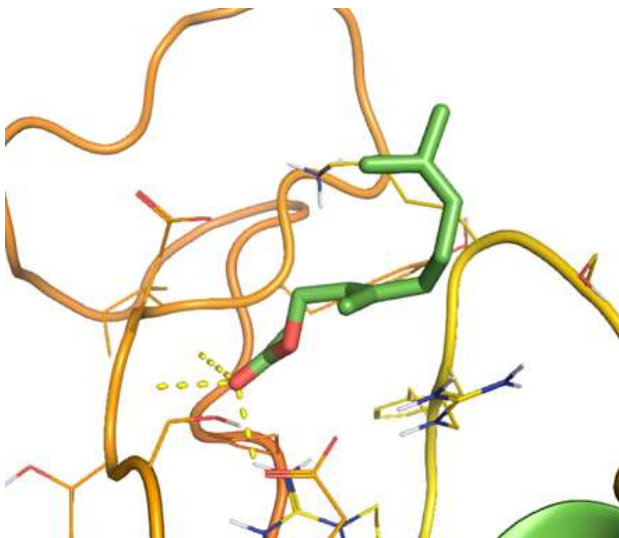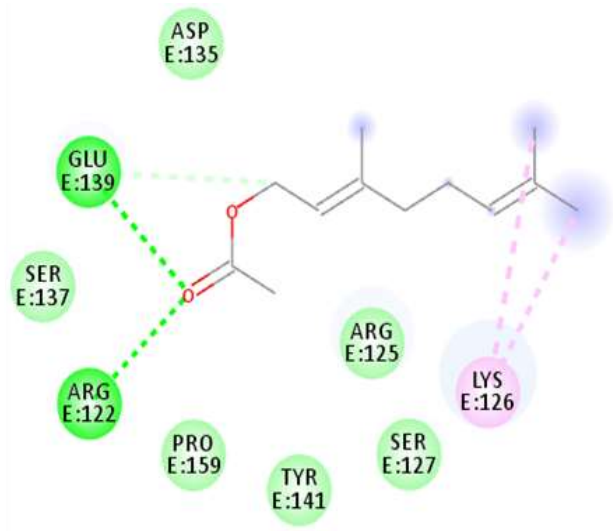

### 24. Nerolidol

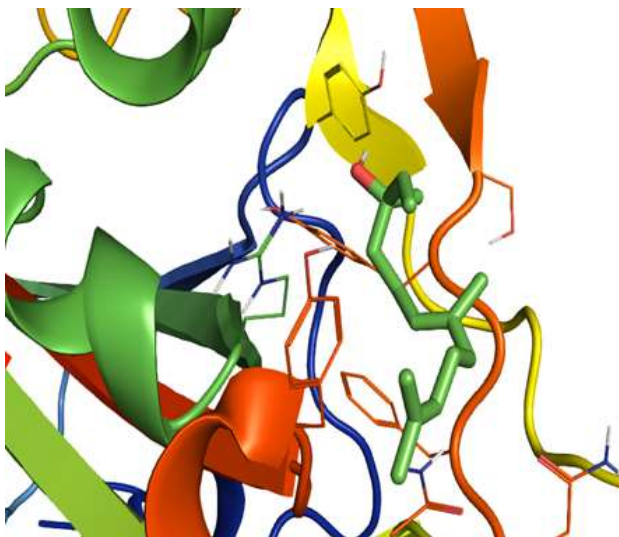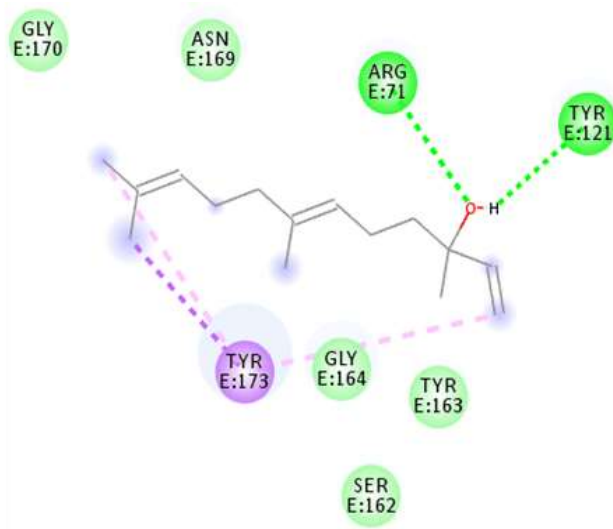



## 25. Terpineol

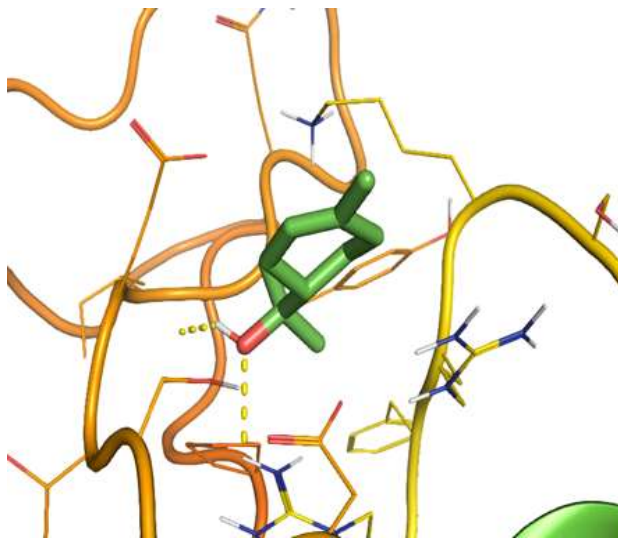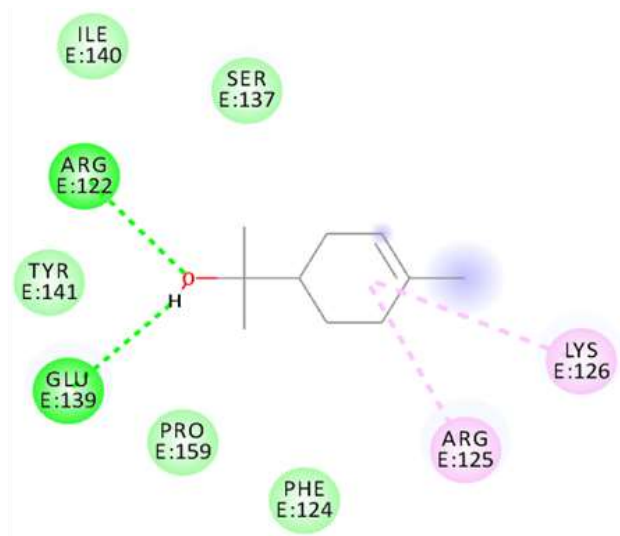

## 26. Decanal

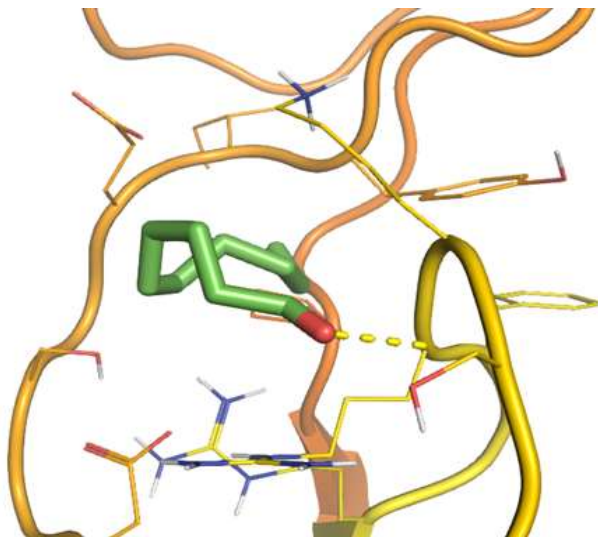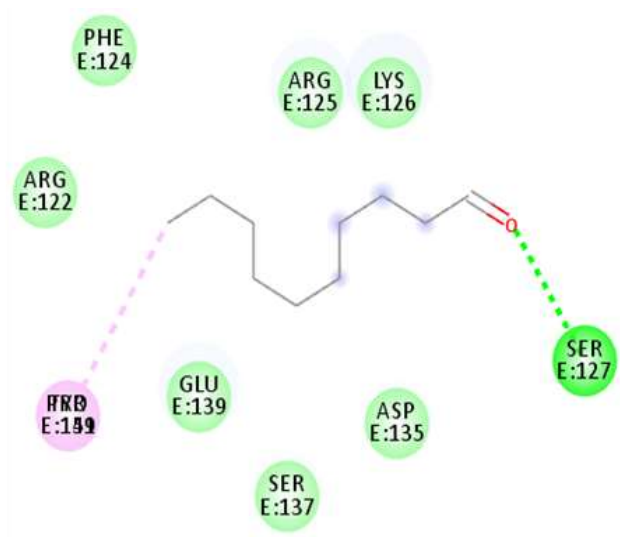

**Figure S3:** Lowest energy docked pose of 26 spice molecules with SARS-Cov-2 RBD Spro (PDB ID: 6M0J) and their 2D interaction diagram.

## 1. 2-Decenoic acid

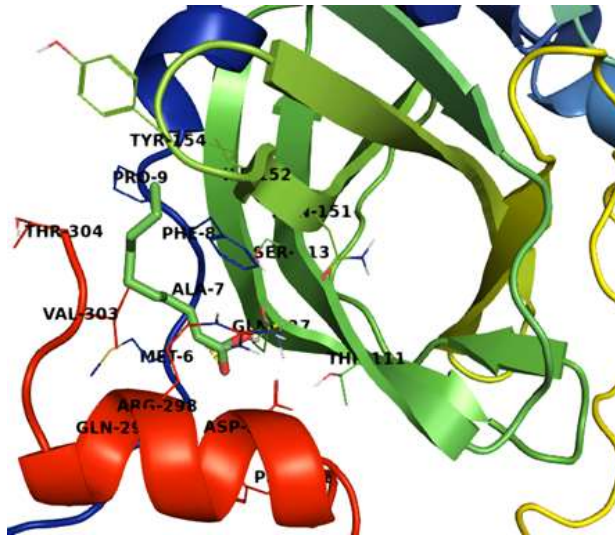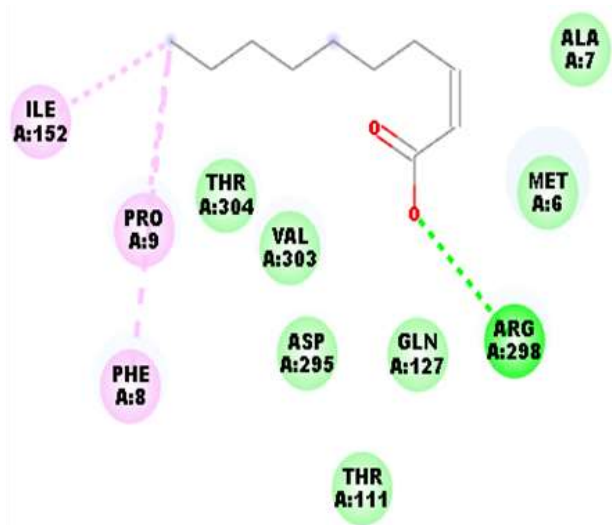

## 2. Alpha-terpinyl acetate

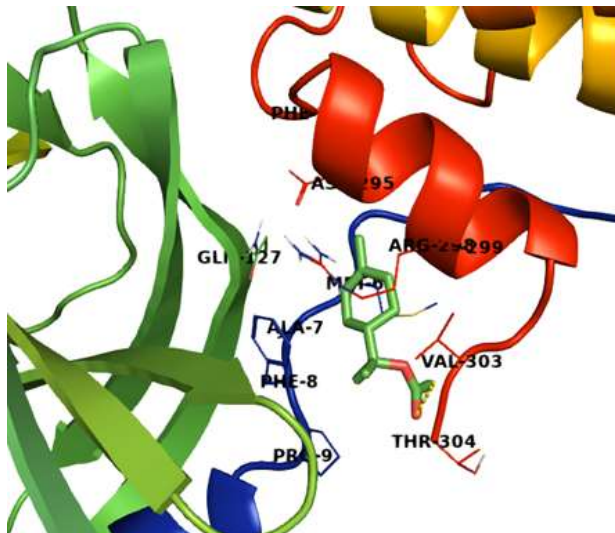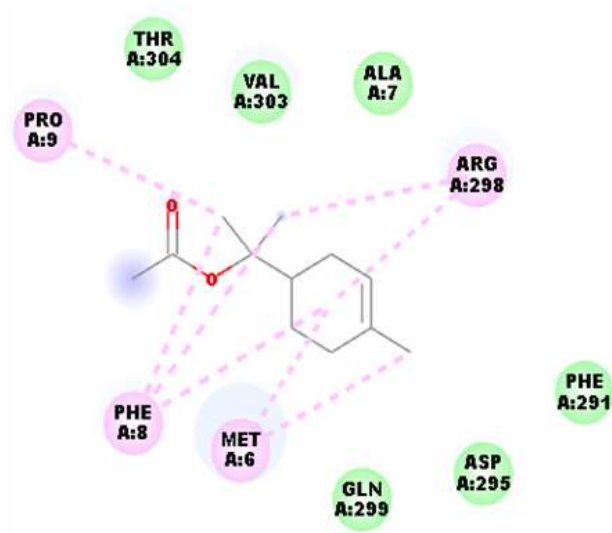

### 3. Cinnamaldehyde

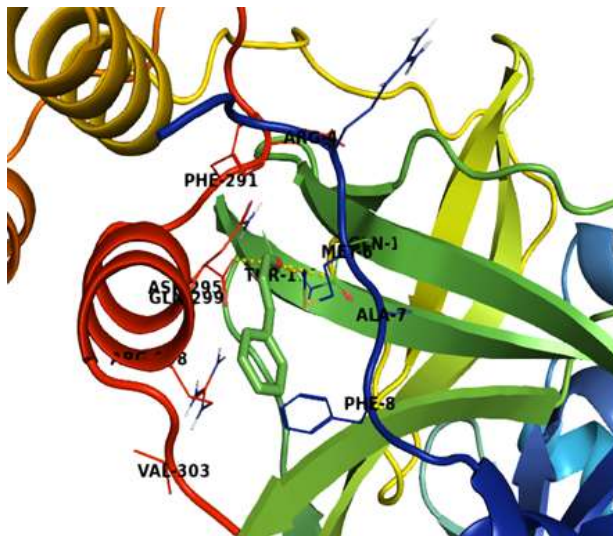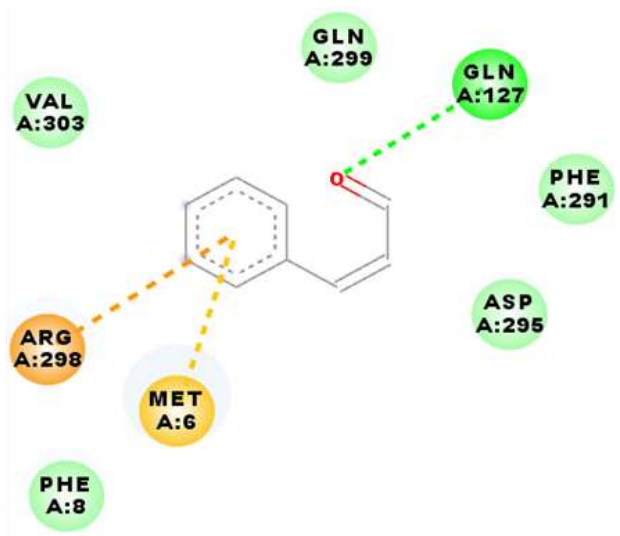

### 4. Cuminaldehyde

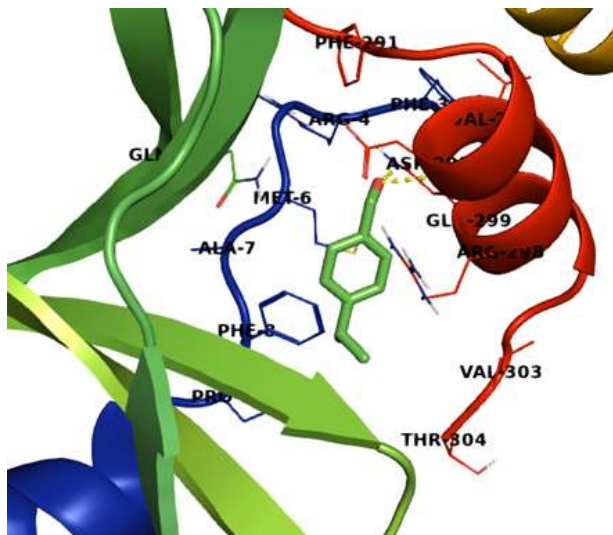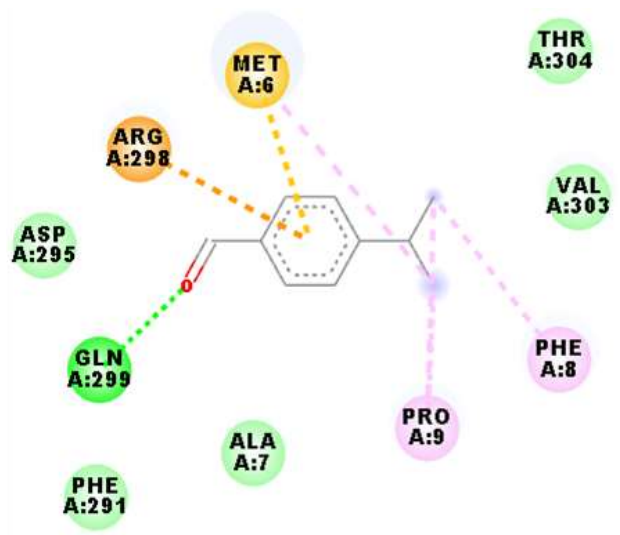

## 5. Dipropyl disulfide

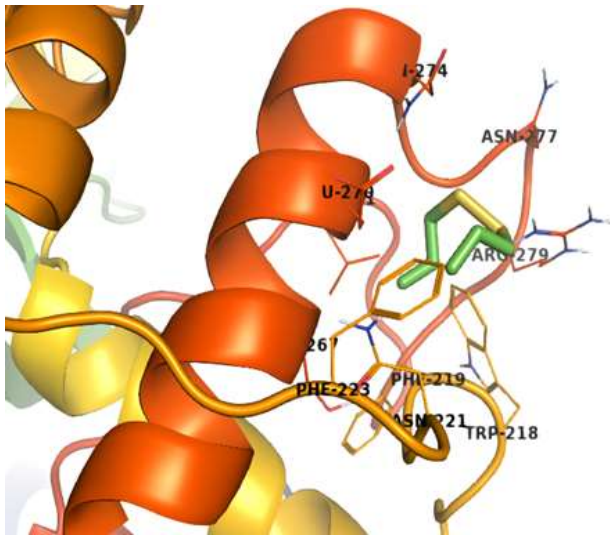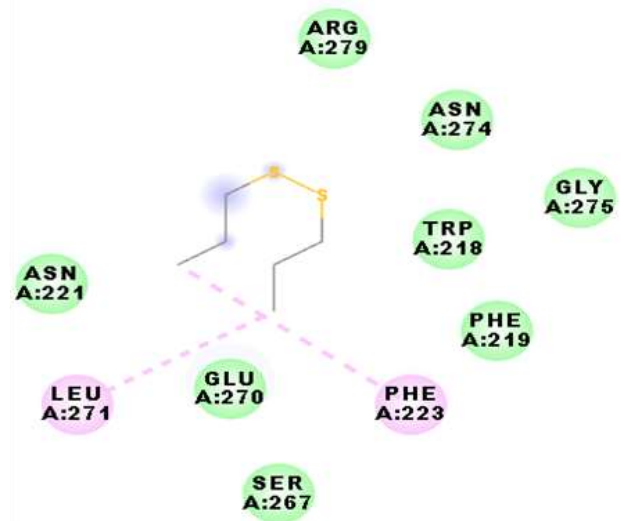

## 6. Eucalyptol

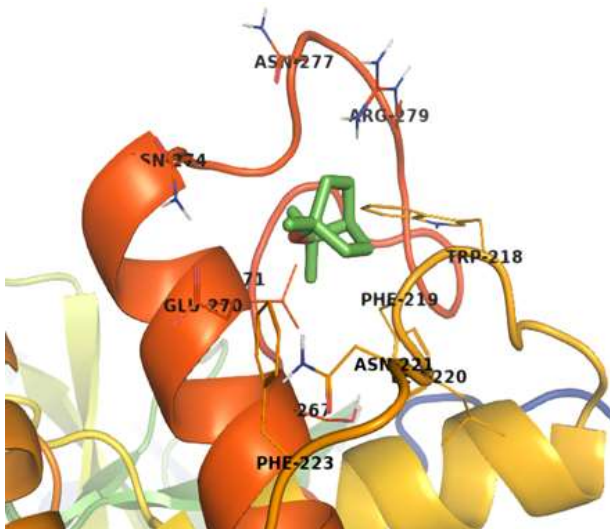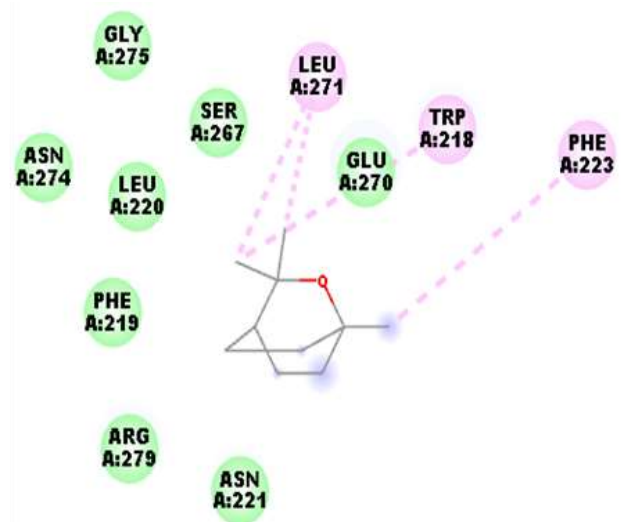

## 7. Linalool

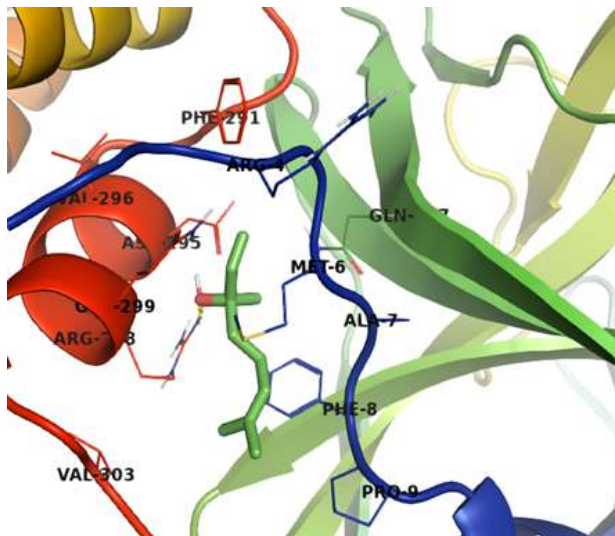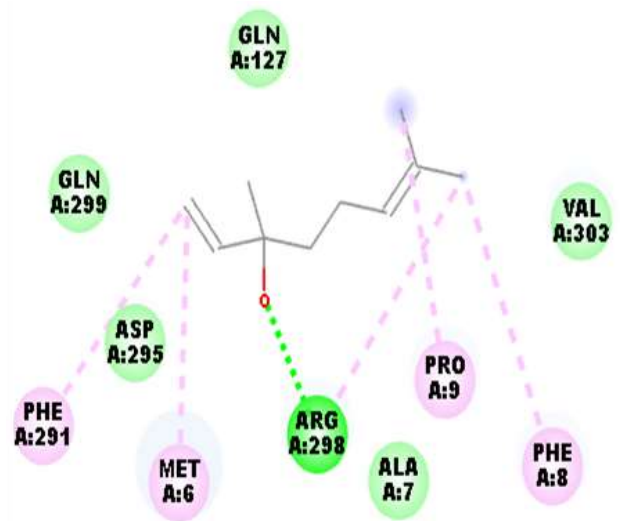

## 8. Vanillin

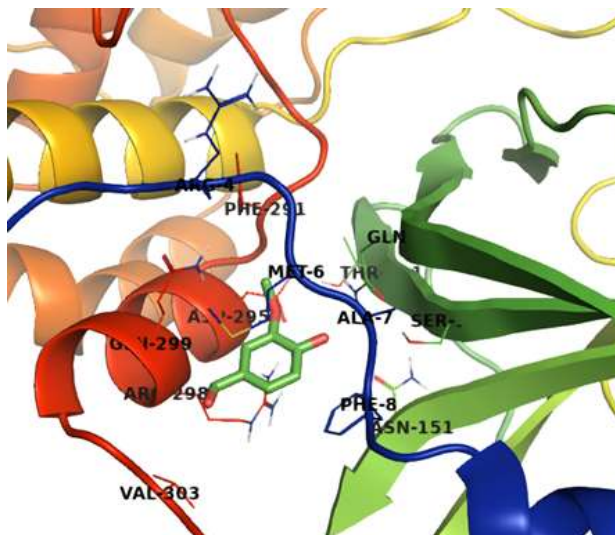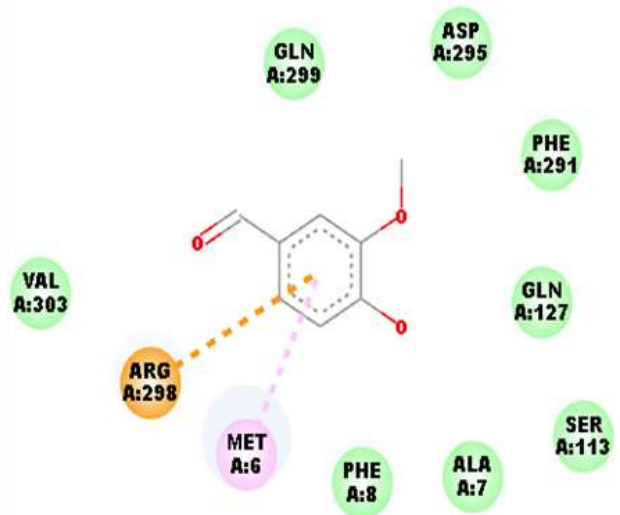

## 9. Thymol

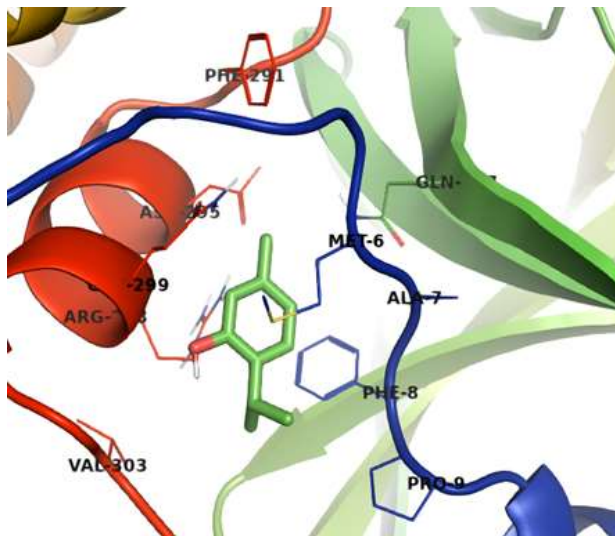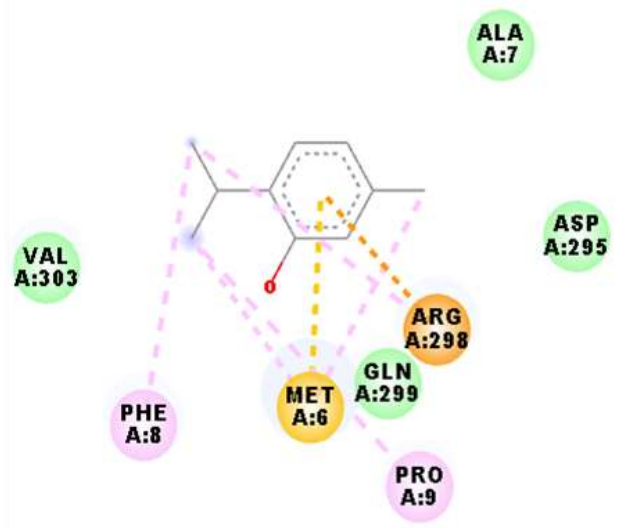

## 10. Sabinene hydrate

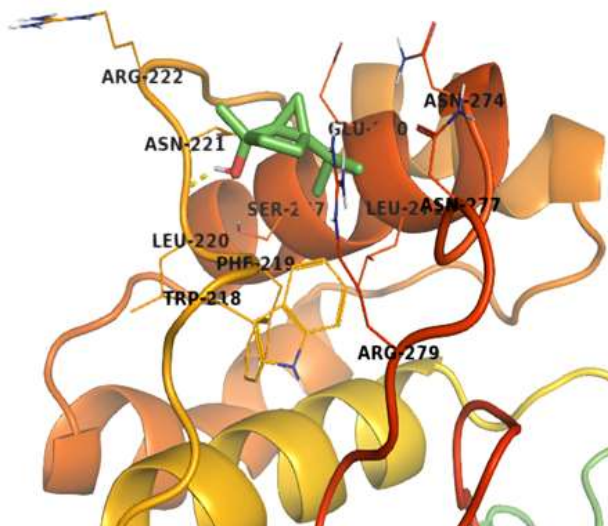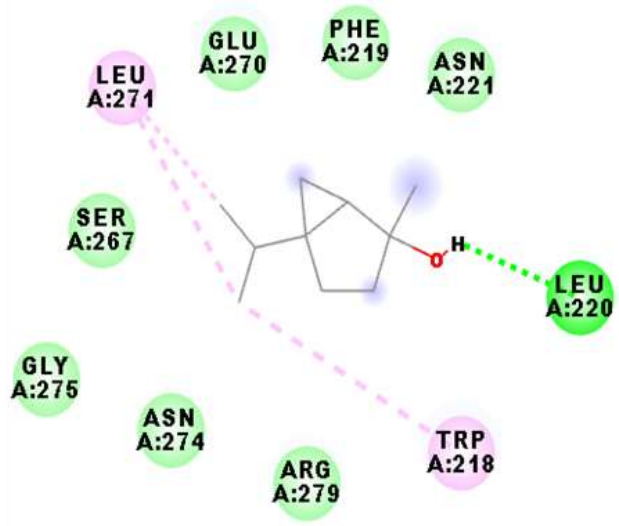

## 11. Menthol

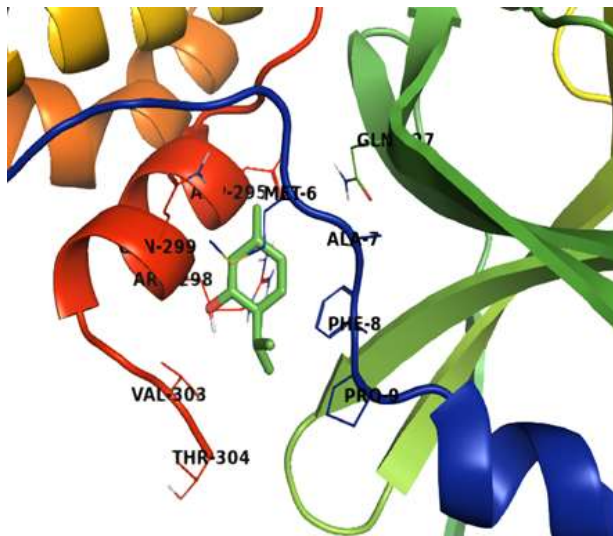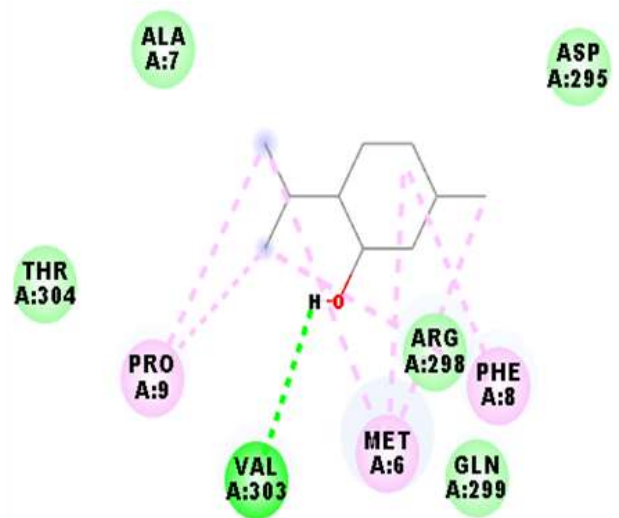

## 12. Eugenol

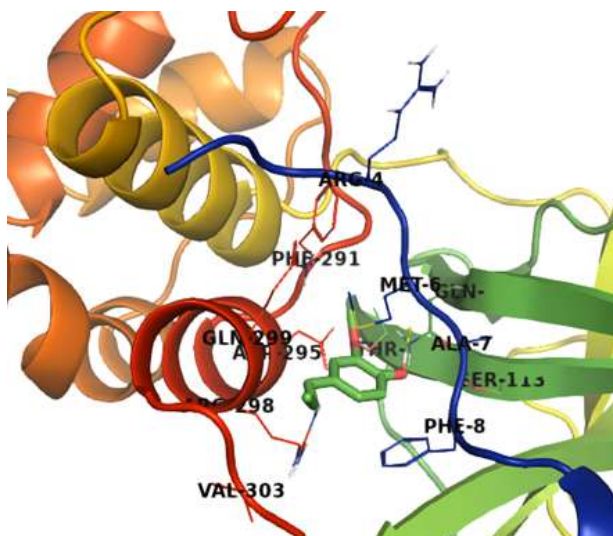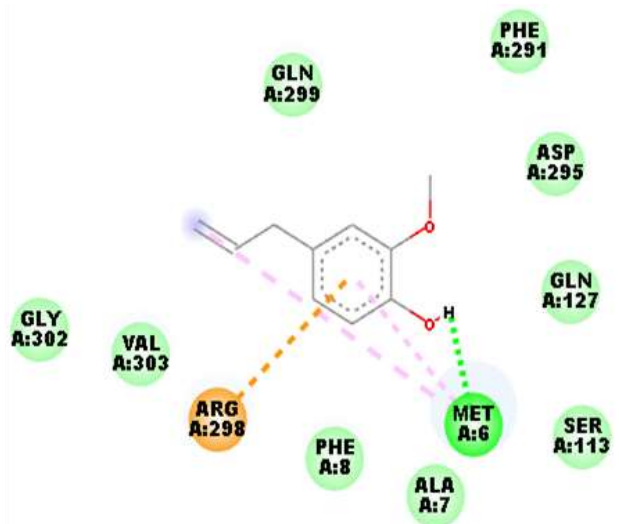

### 13. Estragole

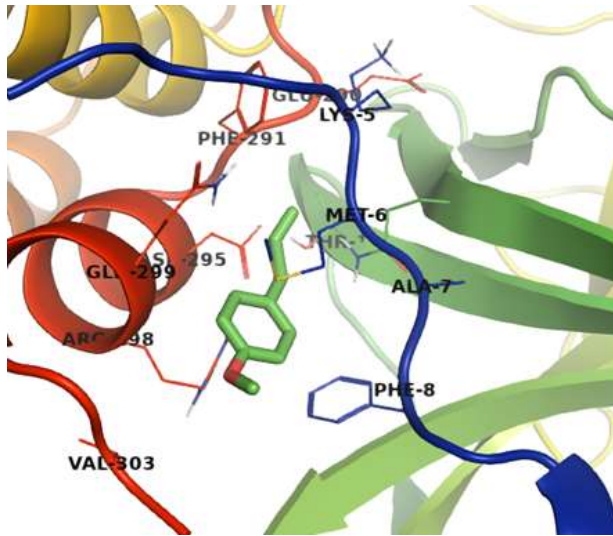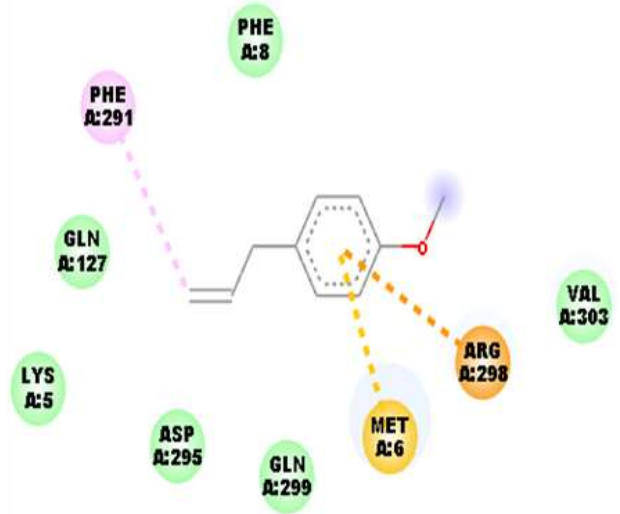

### 14. Shogaol

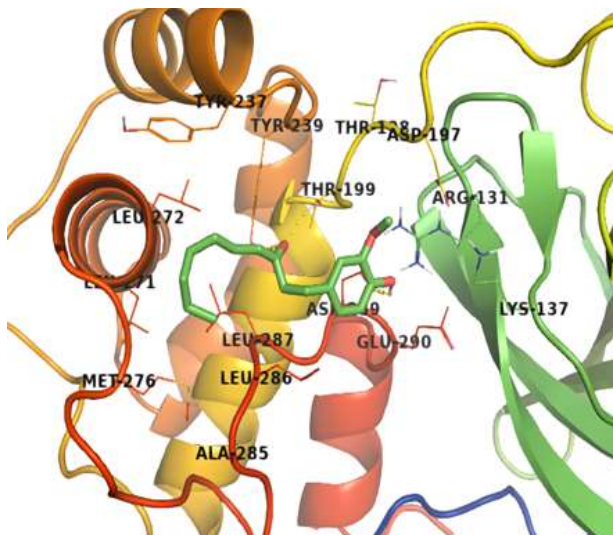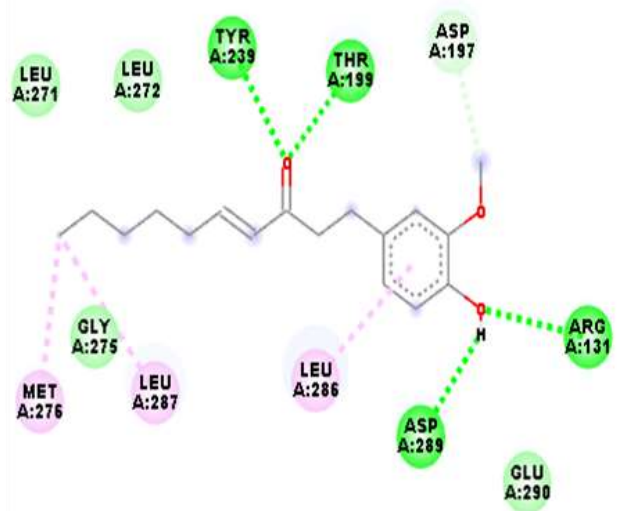



## 15. Paradol

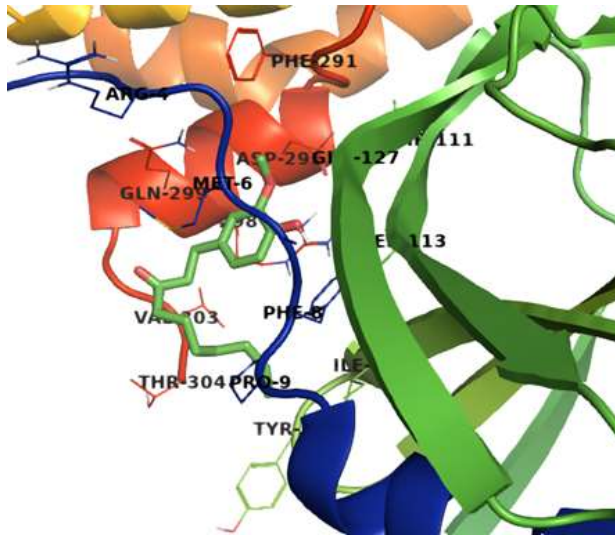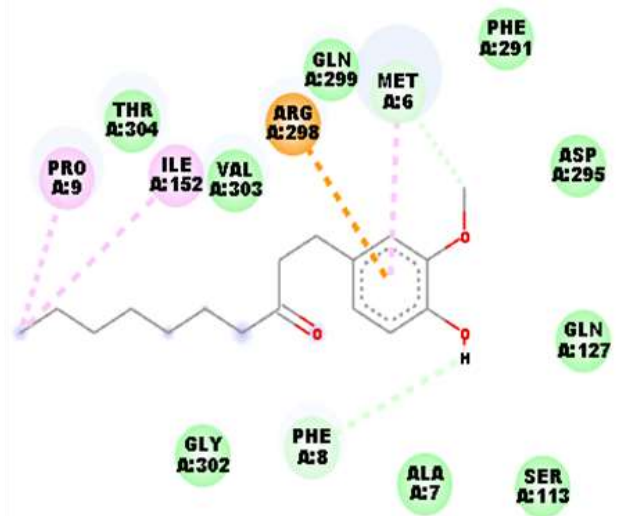

## 16. Zingerone

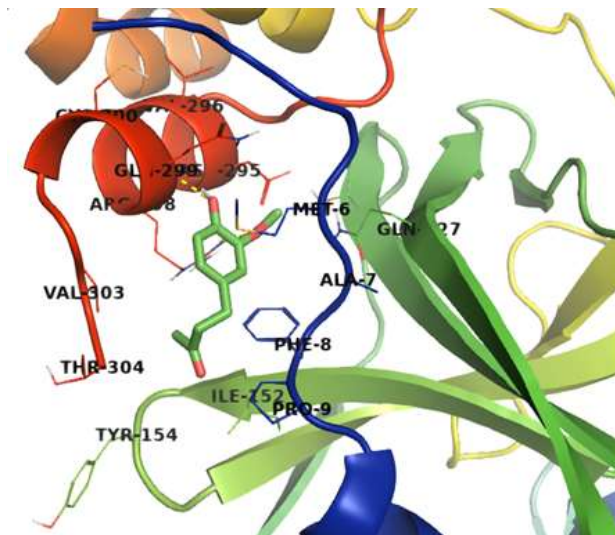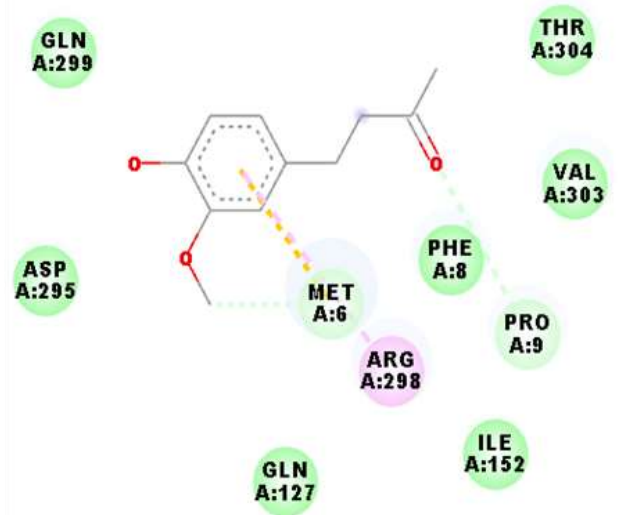

## 17. Borneol

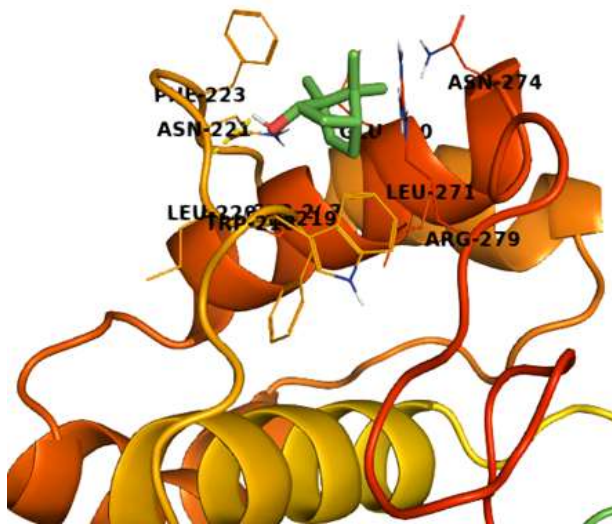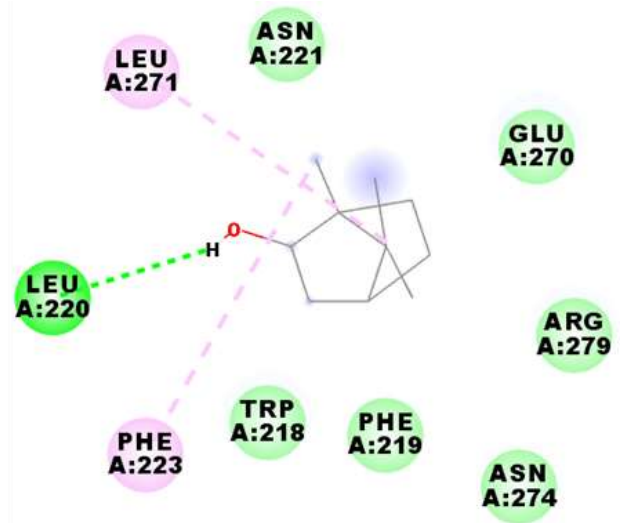

## 18. Bornyl acetate

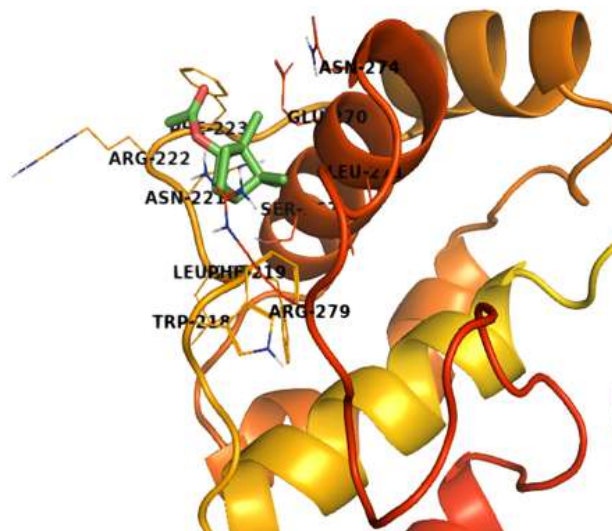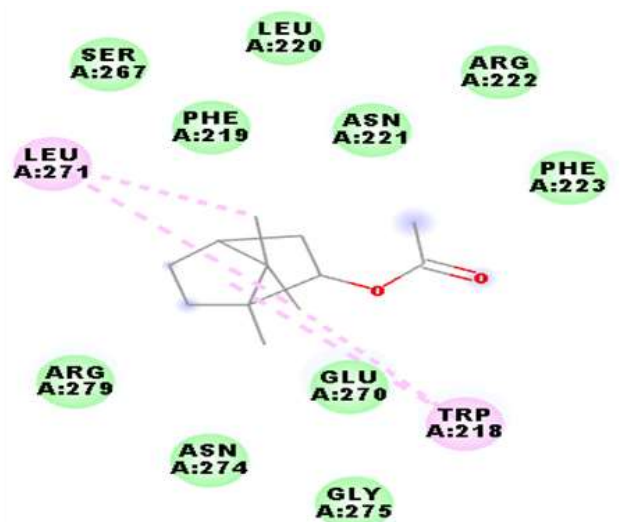

## 19. Citral

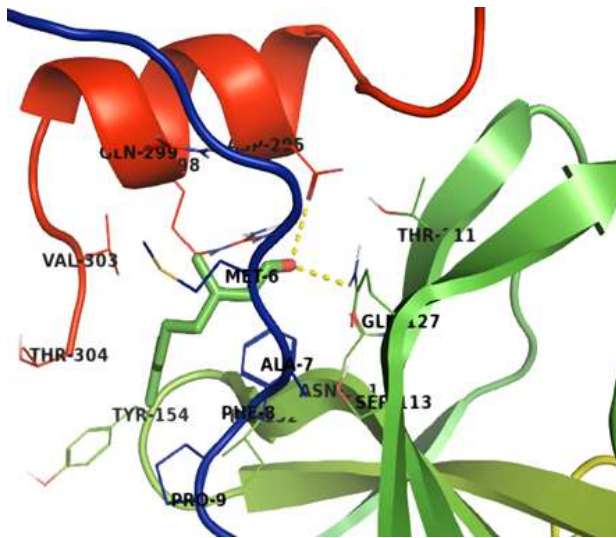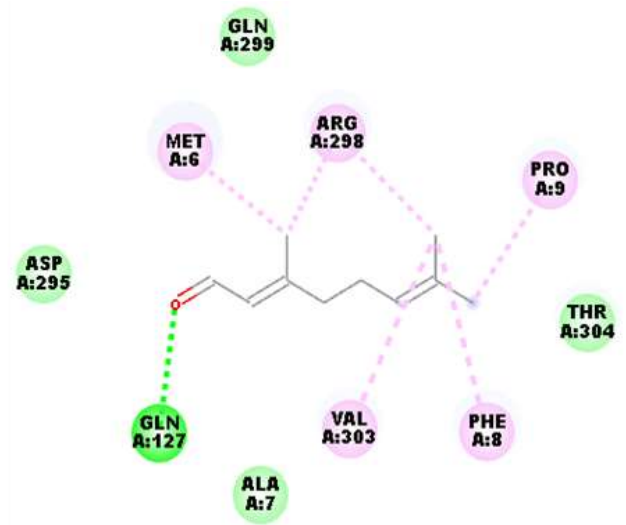

## 20. Citronellal

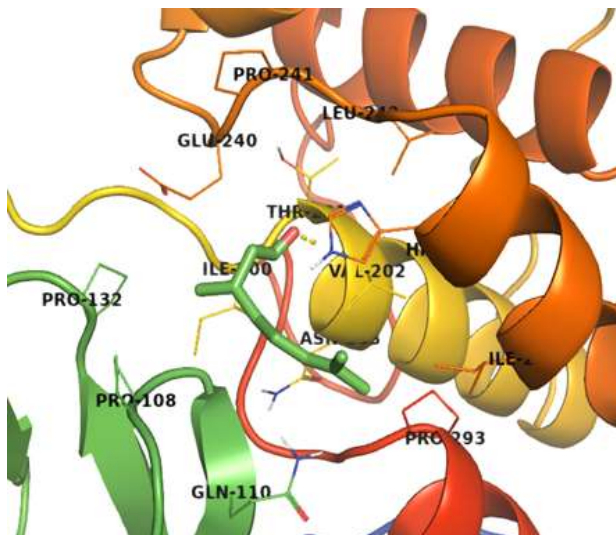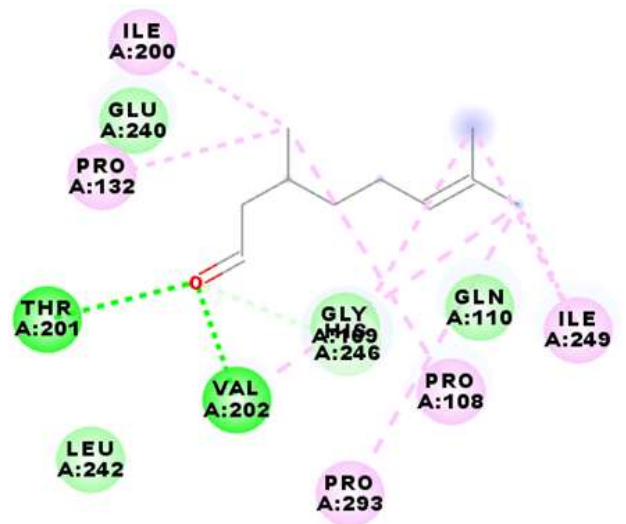

## 21. 2-Undecanone

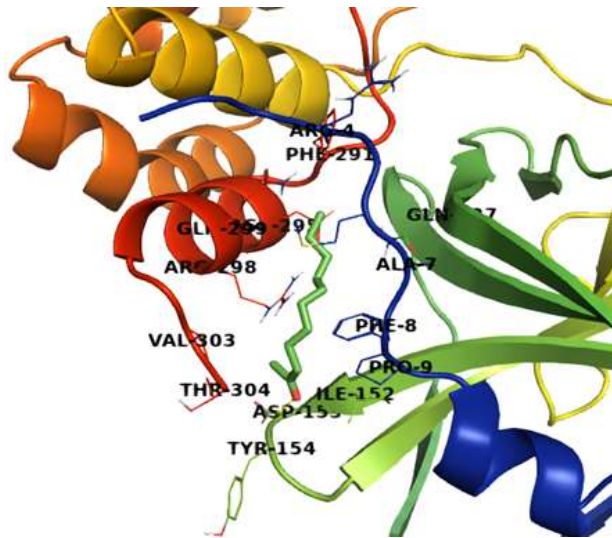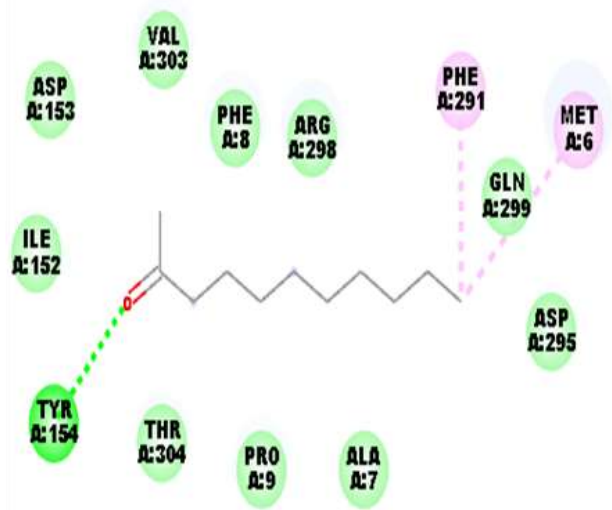

## 22. Geranyl acetate

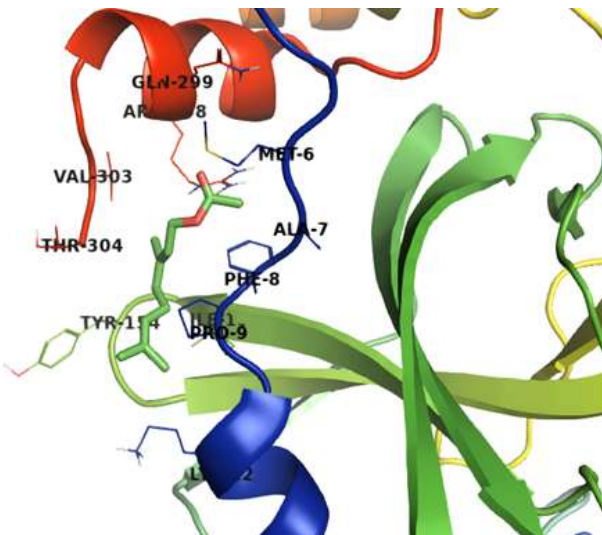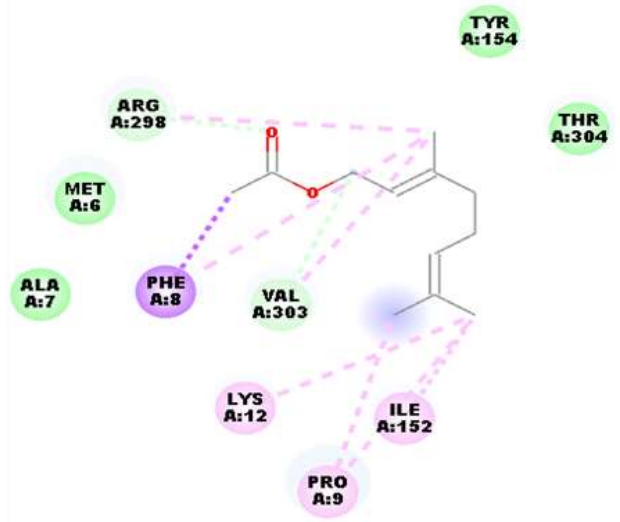

### 23. Nerolidol

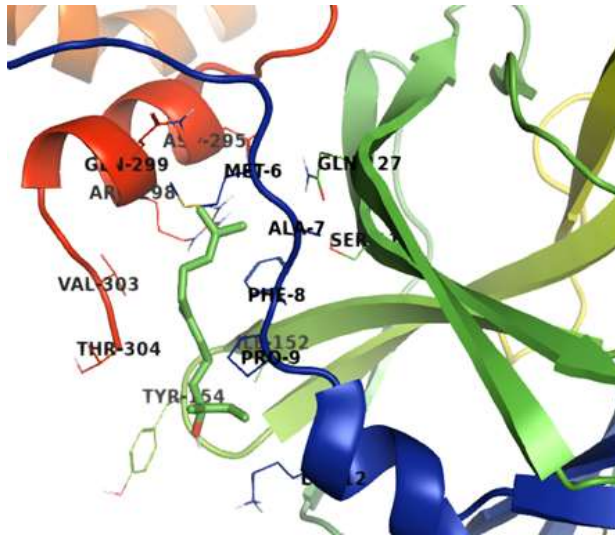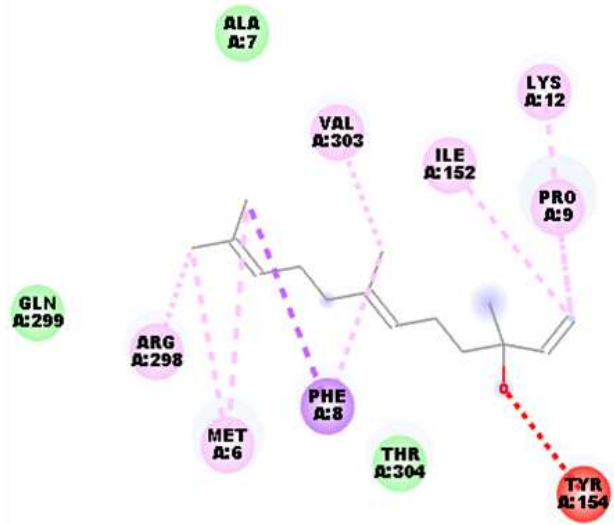

### 24. Terpinen-4-ol

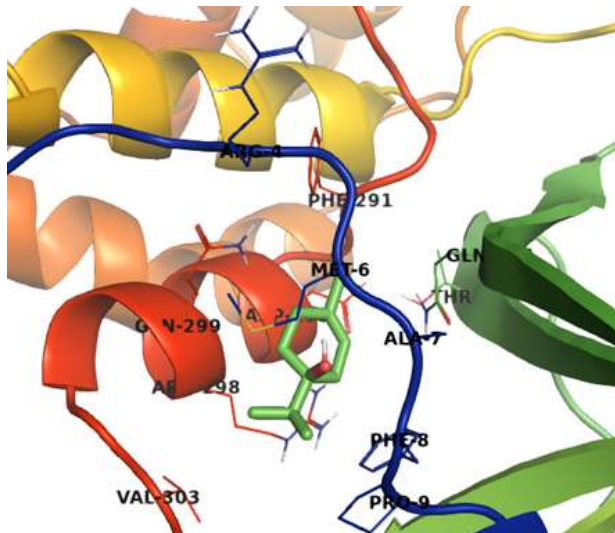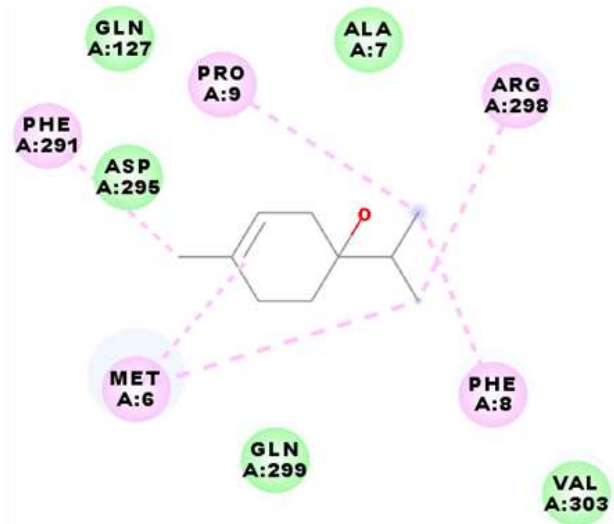

## 25. Terpineol

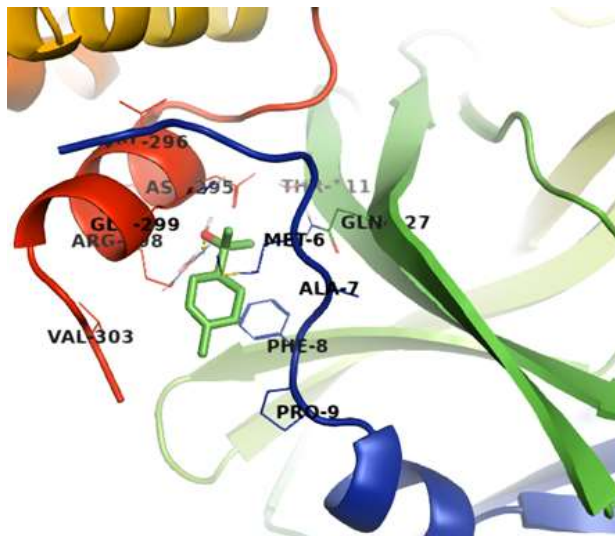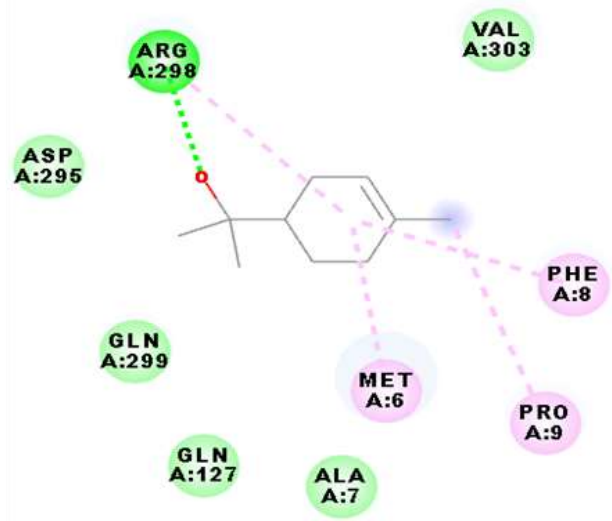

## 26. Decanal

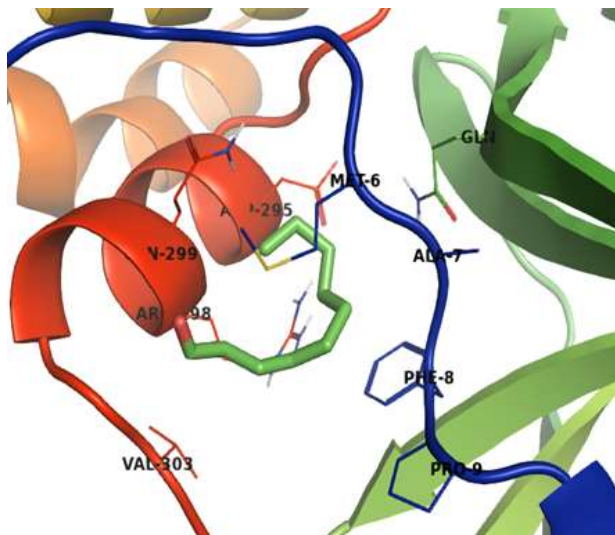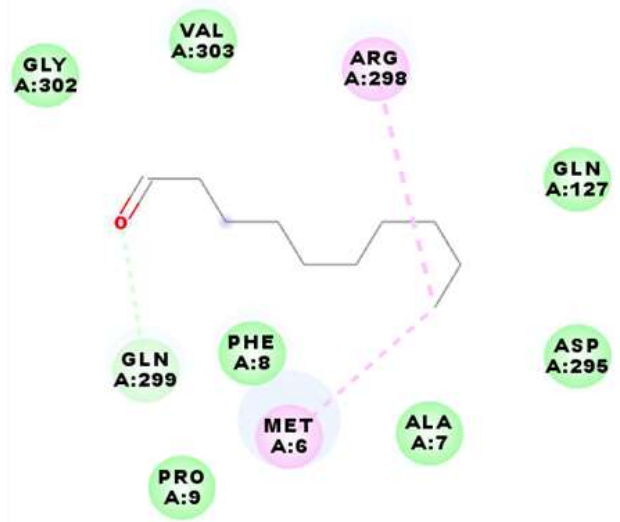

**Figure S4:** Lowest energy docked pose of 26 molecules with SARS-Cov-2 Mpro (PDB ID: 6Y84) and their 2D interaction diagram.

## Chloroquine

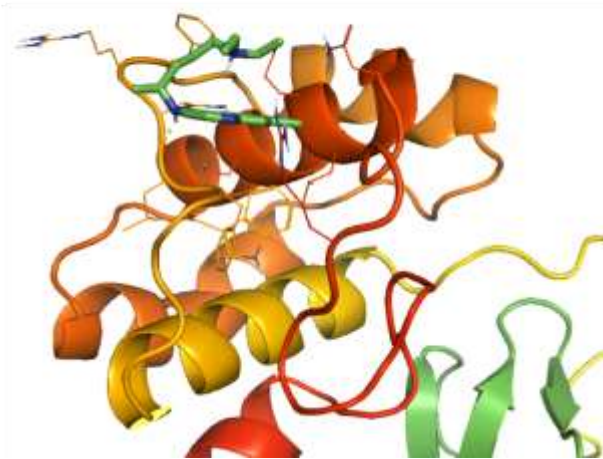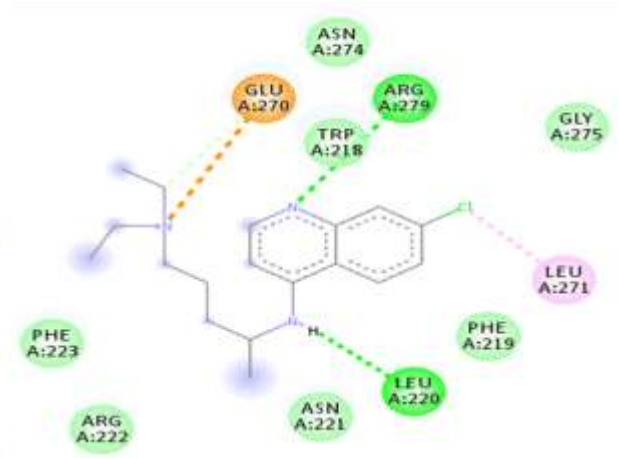

## Favipiravir

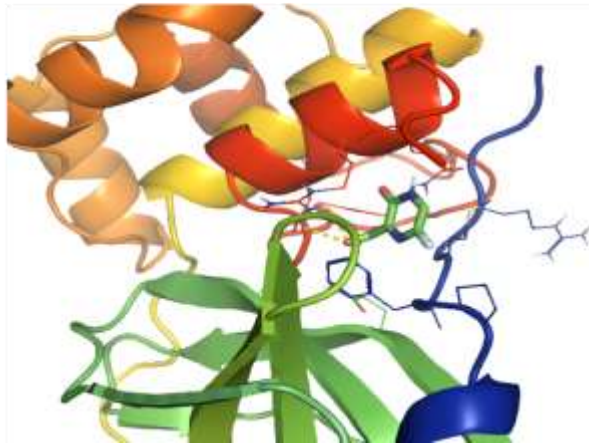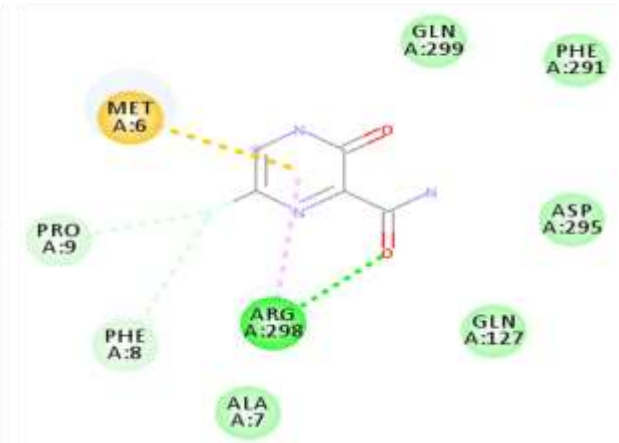

## Hydroxychloroquine

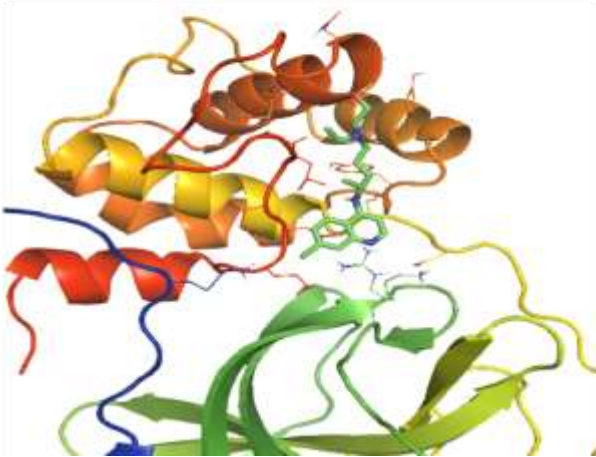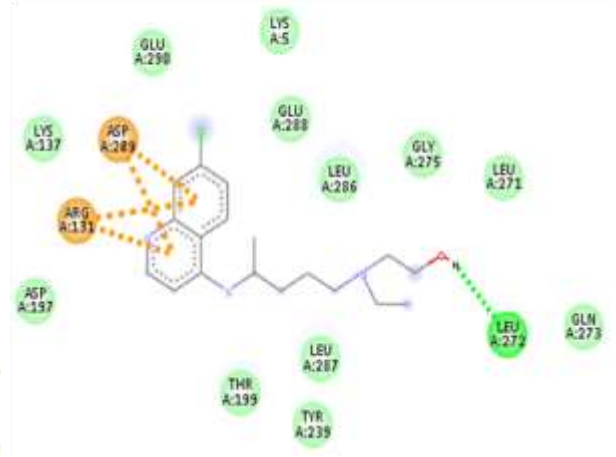

## Oseltamivir

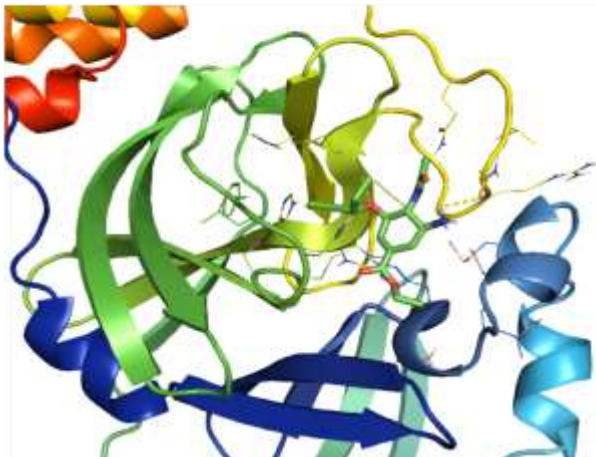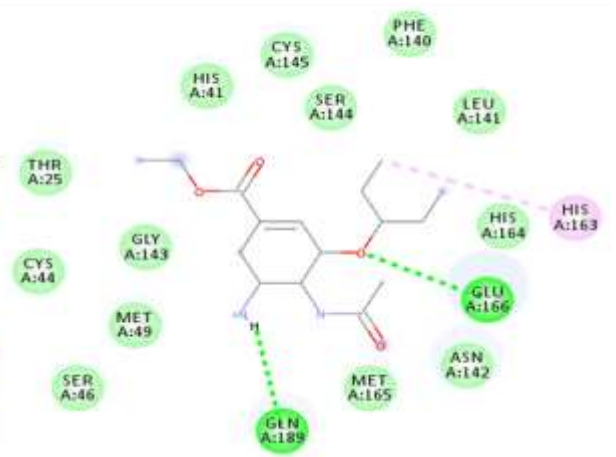



## Remdesivir

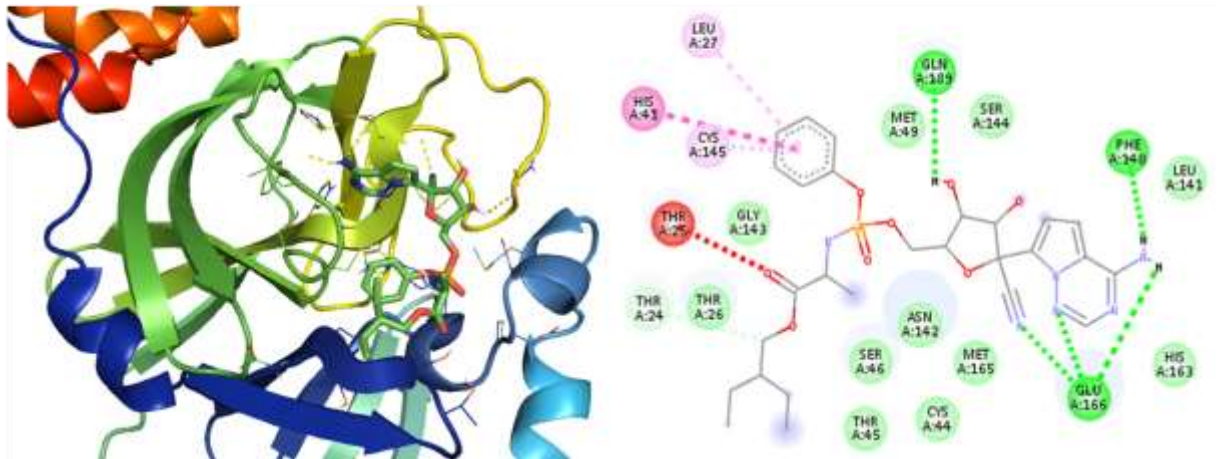

## Ribavirin

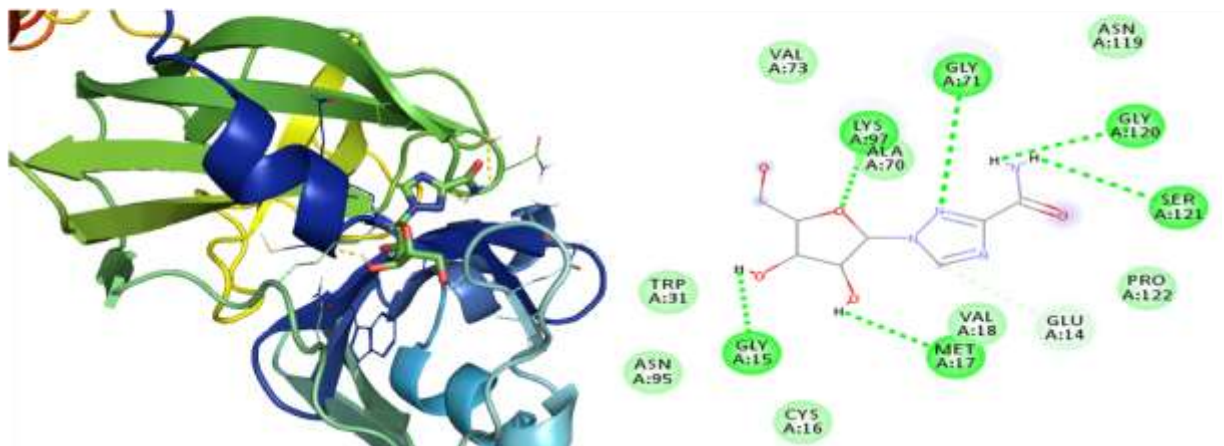

**Figure S5:** Lowest energy docked pose of a few currently used drugs with SARS-Cov-2 Mpro (PDB ID: 6Y84) and their 2D interaction diagram.

## Chloroquine

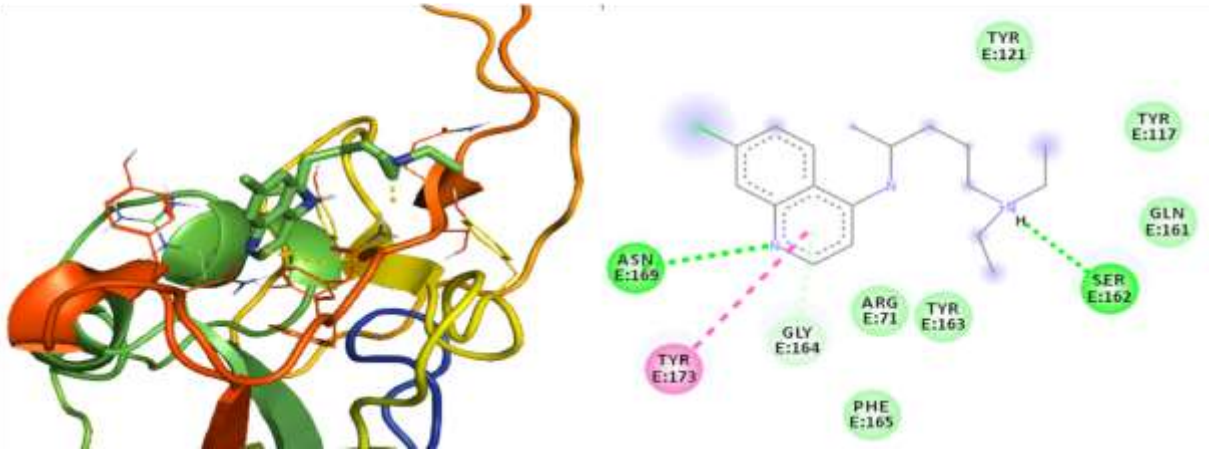

## Favipiravir

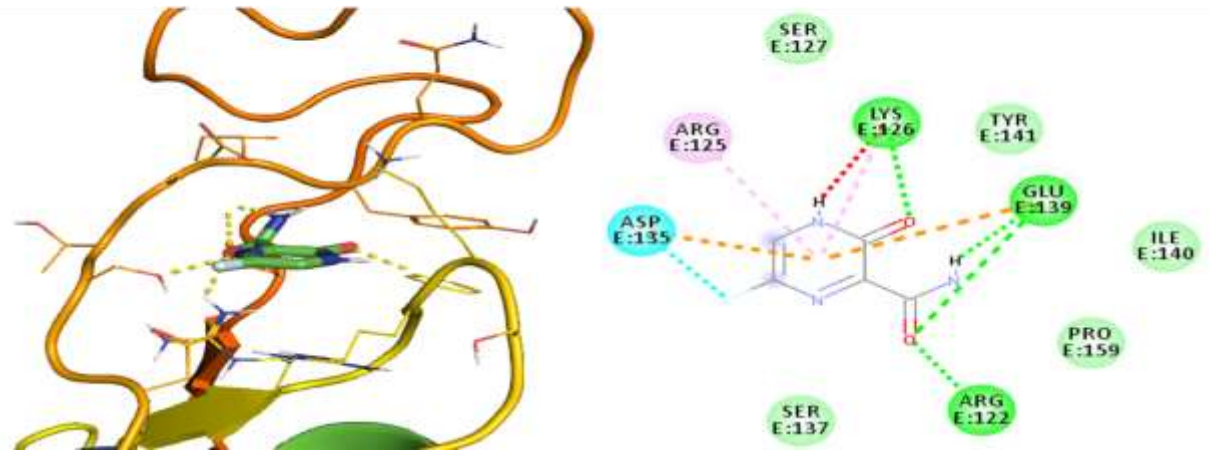

## Hydroxychloroquine

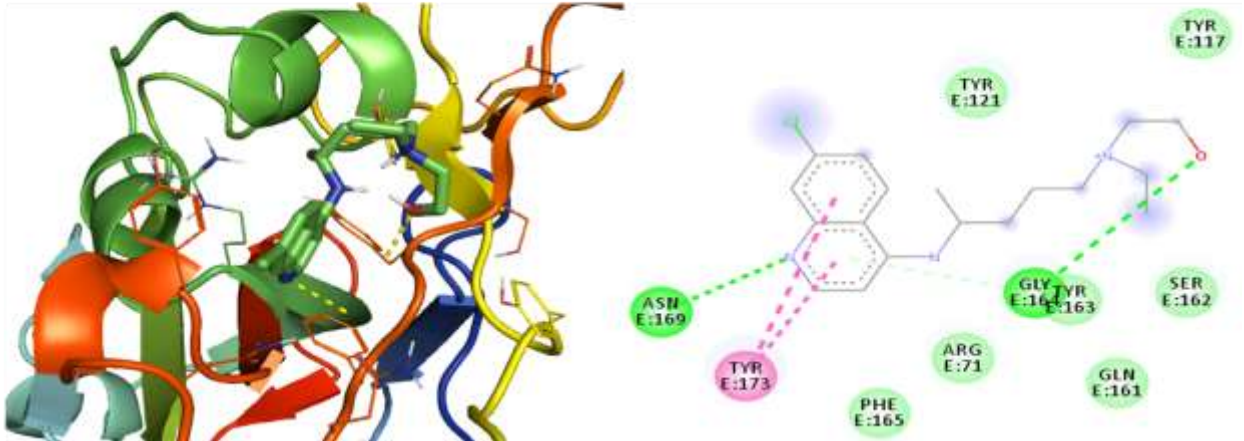

## Oseltamivir

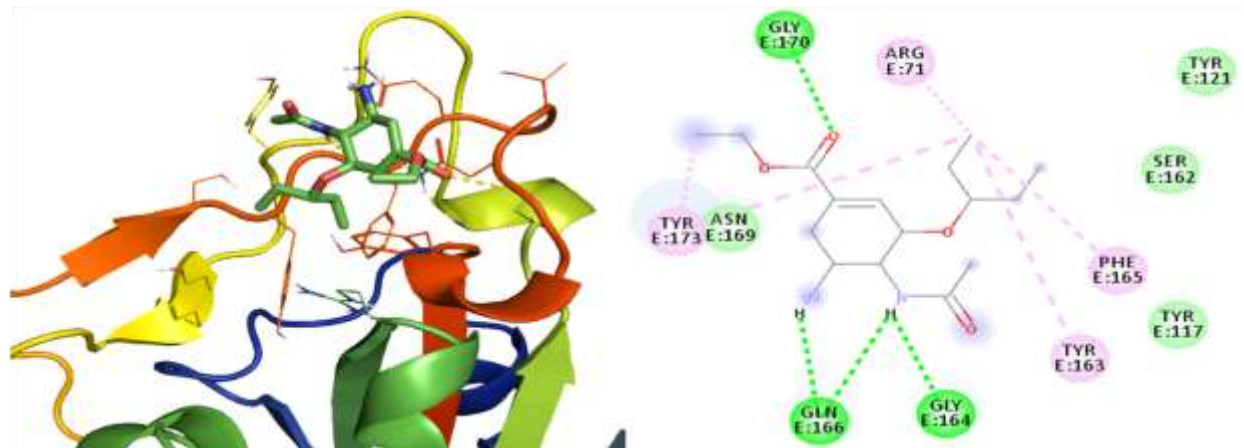

## Remdesivir

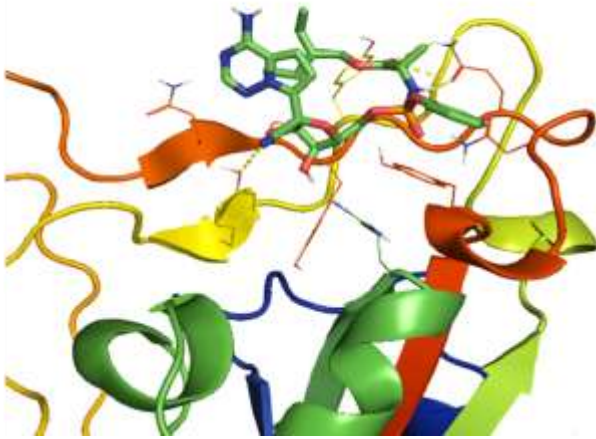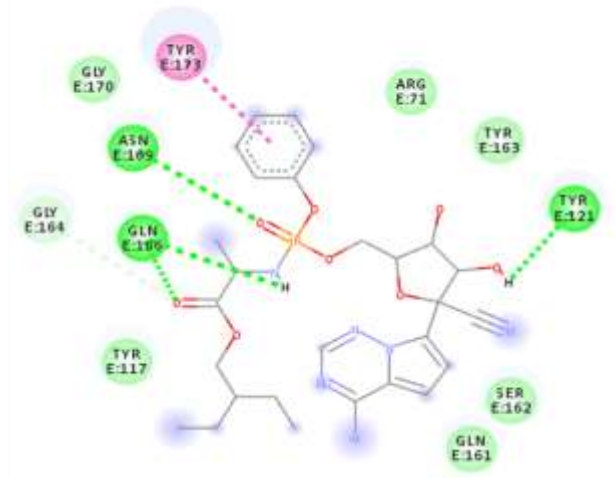

## Ribavirin

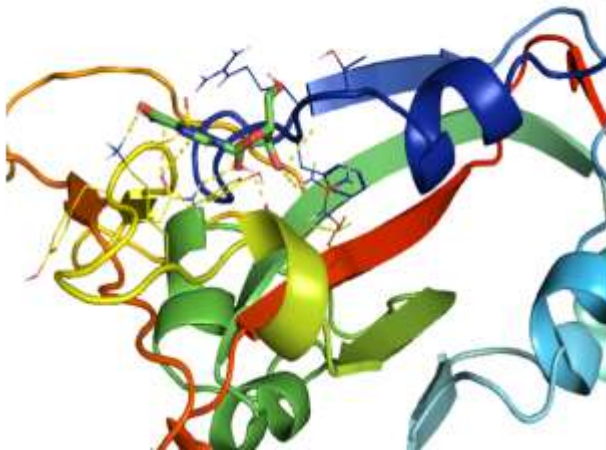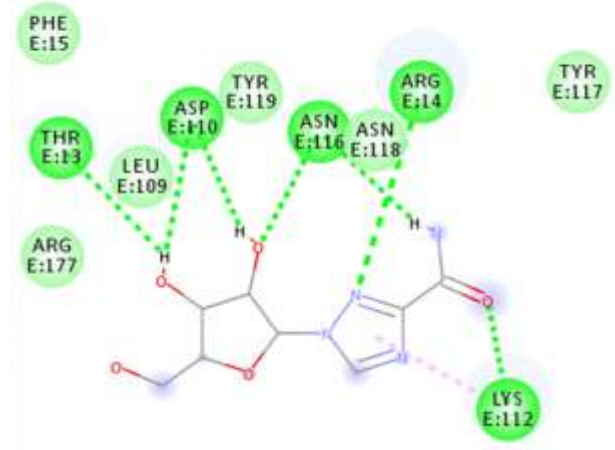

**Figure S6:** Lowest energy docked pose of a few currently used drugs with SARS-Cov-2 RBD Spro (PDB ID: 6M0J) and their 2D interaction diagram.

## References

- Anwar, S., Ahmed, N., Habibatni, S. & Abusamra, Y. (2016). Chapter 19 - Ajwain (*Trachyspermum ammi* L.) Oils. *Essential Oils in Food Preservation, Flavor and Safety*. V. R. Preedy. San Diego, Academic Press: 181-192.
- Baysal, T. & Starmans, D. A. J. (1999). Supercritical carbon dioxide extraction of carvone and limonene from caraway seed. *The Journal of Supercritical Fluids* 14: 225-234.
- Bernhard, R. A., Wijesekera, R. O. B. & Chichester, C. O. (1971). Terpenoids of cardamom oil and their comparative distribution among varieties. *Phytochemistry* 10: 177-184.
- Bisht, D. & Chanotiya, C. S. (2011). 2-undecanone rich leaf essential oil from *Zanthoxylum armatum*. *Nat Prod Commun* 6: 111-114.
- Bonikowski, R., Celinski, K., Wojnicka-Poltorak, A. & Malinski, T. (2015). Composition of essential oils isolated from the needles of *Pinus uncinata* and *P. uliginosa* grown in Poland. *Nat Prod Commun* 10: 371-373.
- Chen, J., Wang, W., Shi, C. & Fang, J. (2014). A Comparative Study of Sodium Houttuynonate and 2-Undecanone for Their in Vitro and in Vivo Anti-Inflammatory Activities and Stabilities. *International Journal of Molecular Sciences* 15.
- Chen, Q., Hu, X., Li, J., Liu, P., Yang, Y. & Ni, Y. (2011). Preparative isolation and purification of cuminaldehyde and p-menta-1,4-dien-7-al from the essential oil of *Cuminum cyminum* L. by high-speed counter-current chromatography. *Analytica Chimica Acta* 689: 149-154.
- Chowdhury, S. & Kumar, S. (2020). Alpha-terpinyl acetate: A natural monoterpene from *Elettaria cardamomum* as multi-target directed ligand in Alzheimer's disease. *Journal of Functional Foods* 68: 103892.
- De Vincenzi, M., Silano, M., De Vincenzi, A., Maialetti, F. & Scazzocchio, B. (2002). Constituents of aromatic plants: eucalyptol. *Fitoterapia* 73: 269-275.
- Dubey, V. S. & Luthra, R. (2001). Biotransformation of geranyl acetate to geraniol during palmarosa (*Cymbopogon martinii*, Roxb. wats. var. *motia*) inflorescence development. *Phytochemistry* 57: 675-680.
- Fu, E., McCue, K. & Boesenberg, D. (2007). F.1 - Chemical Disinfection of Hard Surfaces – Household, Industrial and Institutional Settings. *Handbook for Cleaning/Decontamination of Surfaces*. I. Johansson and P. Somasundaran. Amsterdam, Elsevier Science B.V.: 573-592.
- Hayman, M. & Kam, P. C. A. (2008). Capsaicin: A review of its pharmacology and clinical applications. *Current Anaesthesia & Critical Care* 19: 338-343.
- Jadhav, D., B.N, R., Gogate, P. R. & Rathod, V. K. (2009). Extraction of vanillin from vanilla pods: A comparison study of conventional soxhlet and ultrasound assisted extraction. *Journal of Food Engineering* 93: 421-426.
- Juergens, U. R., Dethlefsen, U., Steinkamp, G., Gillissen, A., Regges, R. & Vetter, H. (2003). Anti-inflammatory activity of 1.8-cineol (eucalyptol) in bronchial asthma: a double-blind placebo-controlled trial. *Respiratory medicine* 97: 250-256.
- Khalil, A. A., Rahman, U. u., Khan, M. R., Sahar, A., Mehmood, T. & Khan, M. (2017). Essential oil eugenol: sources, extraction techniques and nutraceutical perspectives. *RSC Advances* 7: 32669-32681.
- Klopell, F. C., Lemos, M., Sousa, J. P., Comunello, E., Maistro, E. L., Bastos, J. K. & de Andrade, S. F. (2007). Nerolidol, an antiulcer constituent from the essential oil of *Baccharis dracunculifolia* DC (Asteraceae). *Z Naturforsch C J Biosci* 62: 537-542.
- Laribi, B., Kouki, K., M'Hamdi, M. & Bettaieb, T. (2015). Coriander (*Coriandrum sativum* L.) and its bioactive constituents. *Fitoterapia* 103: 9-26.
- Mandal, S. & Mandal, M. (2015). Coriander (*Coriandrum sativum* L.) essential oil: Chemistry and biological activity. *Asian Pacific Journal of Tropical Biomedicine* 5: 421-428.

- Mao, Q.-Q., Xu, X.-Y., Cao, S.-Y., Gan, R.-Y., Corke, H., Beta, T. & Li, H.-B. (2019). Bioactive Compounds and Bioactivities of Ginger (*Zingiber officinale* Roscoe). *Foods (Basel, Switzerland)* 8: 185.
- Masghati, S. & Ghoreishi, S. M. (2018). Supercritical CO<sub>2</sub> extraction of cinnamaldehyde and eugenol from cinnamon bark: Optimization of operating conditions via response surface methodology. *The Journal of Supercritical Fluids* 140: 62-71.
- Mnayer, D., Fabiano-Tixier, A.-S., Petitcolas, E., Hamieh, T., Nehme, N., Ferrant, C., Fernandez, X. & Chemat, F. (2014). Chemical Composition, Antibacterial and Antioxidant Activities of Six Essentials Oils from the Alliaceae Family. 19: 20034-20053.
- Mykhailenko, O. J. T. J. o. P. S. (2018). Composition of Volatile Oil of *Iris pallida* Lam. from Ukraine. 15.
- Nagoor Meeran, M. F., Jagadeesh, G. S. & Selvaraj, P. (2016). Thymol, a dietary monoterpene phenol abrogates mitochondrial dysfunction in  $\beta$ -adrenergic agonist induced myocardial infarcted rats by inhibiting oxidative stress. *Chemico-Biological Interactions* 244: 159-168.
- Nair, B. (2001). Final report on the safety assessment of *Mentha Piperita* (Peppermint) Oil, *Mentha Piperita* (Peppermint) Leaf Extract, *Mentha Piperita* (Peppermint) Leaf, and *Mentha Piperita* (Peppermint) Leaf Water. *Int J Toxicol* 20 Suppl 3: 61-73.
- Novak, J., Bitsch, C., Langbehn, J., Pank, F., Skoula, M., Gotsiou, Y. & C, M. F. (2000). Ratios of cis- and trans-Sabinene Hydrate in *Origanum majorana* L. and *Origanum microphyllum* (Benth) Vogel. *Biochem Syst Ecol* 28: 697-704.
- Pujiastuti, A., Cahyono, E. & Sumarni, W. (2017). Encapsulation of Citronellal from Citronella Oil using  $\beta$ -Cyclodextrin and Its Application as Mosquito (*Aedes aegypti*) Repellent. *Journal of Physics: Conference Series* 824: 012016.
- Pushpangadan, P. & George, V. (2012). 4 - Basil. *Handbook of Herbs and Spices (Second Edition)*. K. V. Peter, Woodhead Publishing: 55-72.
- Raman, G. & Gaikar, V. G. (2002). Extraction of Piperine from *Piper nigrum* (Black Pepper) by Hydrotropic Solubilization. *Industrial & Engineering Chemistry Research* 41: 2966-2976.
- Shapira, S., Pleban, S., Kazanov, D., Tirosh, P. & Arber, N. (2016). Terpinen-4-ol: A Novel and Promising Therapeutic Agent for Human Gastrointestinal Cancers. *PLOS ONE* 11: e0156540.
- Sheng, L.-S., Du, L.-D., Qiang, G.-F. & Du, G.-H. (2018). Borneol. *Natural Small Molecule Drugs from Plants*. G.-H. Du. Singapore, Springer Singapore: 187-192.
- Silva, C. F., Moura, F. C., Mendes, M. F. & Pessoa, F. L. P. (2011). Extraction of citronella (*Cymbopogon nardus*) essential oil using supercritical CO<sub>2</sub>: experimental data and mathematical modeling %J Brazilian Journal of Chemical Engineering. 28: 343-350.
- Tamer, C. E., Suna, S. & Özcan-Sinir, G. (2019). 14 - Toxicological Aspects of Ingredients Used in Nonalcoholic Beverages. *Non-Alcoholic Beverages*. A. M. Grumezescu and A. M. Holban, Woodhead Publishing: 441-481.
